# Supplementary material for: Computational maturation of a single-domain antibody against Aβ42 aggregation
Source: Royal Society of Chemistry journal article supplement (doi:10.1039/d1sc03898b), 2021-01-01
Supplement: d1sc03898b2.zip [file CD-melting temperature-DesAbs.xlsx]

## Sheet: Sheet1
24.6578	5.61864	23.2884	4.06591	24.0605	1.76344	24.9812	3.33986	24.7573	5.60976	24.5832	2.39584	24.2099	1.75193	24.6827	2.67631	24.7325	4.26402
24.5583	5.5979	23.5874	4.01832	24.2099	2.07207	25.0807	3.51554	24.832	5.62388	24.6329	2.52883	24.4339	2.01606	24.7076	2.70556	24.9315	4.45813
24.4588	5.61604	23.8862	4.13405	24.3841	1.88411	25.2299	3.34448	24.8817	5.87302	24.6827	2.45569	24.6329	1.72524	24.7325	2.75727	25.0559	4.2829
24.3841	5.69978	24.1352	4.23371	24.5334	1.80349	25.3294	3.24069	24.9315	5.77842	24.7325	2.56849	24.832	1.98195	24.7822	2.84817	25.2299	4.28754
24.185	5.33999	24.3343	4.19498	24.6827	1.83426	25.4537	3.44916	24.9812	5.78034	24.8071	2.46503	25.031	1.87989	24.8817	2.87403	25.3791	4.22547
24.1352	5.65758	24.5334	3.91697	24.8569	1.93053	25.6029	3.47093	25.0807	5.56568	24.8817	2.6009	25.2051	1.83596	24.9315	2.71607	25.578	4.27983
24.0605	5.5865	24.7325	4.03311	25.031	1.81675	25.752	3.4026	25.2051	5.4408	24.9812	2.41809	25.4289	1.80206	25.031	2.839	25.752	4.14098
24.0356	5.70965	24.9066	4.15202	25.1802	1.93919	25.8515	3.43596	25.3045	5.50182	25.0559	2.64823	25.6278	1.96902	25.1056	2.91995	25.926	4.12357
24.0107	5.43896	25.2051	4.07311	25.3294	1.99043	26.0503	3.71928	25.404	5.88765	25.1553	2.52513	25.8018	1.91032	25.2051	2.75847	26.1	4.32897
24.0107	5.4438	25.3543	4.07631	25.5283	1.69393	26.1994	3.22156	25.5035	5.54382	25.2797	2.54044	26.0006	1.91429	25.3294	2.77227	26.2739	3.9819
24.0107	5.4778	25.578	4.15924	25.6775	2.11596	26.3484	3.35525	25.6526	5.83742	25.404	2.63407	26.1994	1.93713	25.4537	2.7854	26.4478	4.20295
24.0605	5.62027	25.752	4.10746	25.8763	1.84638	26.5471	3.47501	25.7769	5.45365	25.5283	2.5446	26.3733	1.82144	25.5532	2.69855	26.6217	4.29056
24.0854	5.64302	25.926	4.00486	26.0503	1.70591	26.6465	3.49285	25.9012	5.53674	25.6526	2.44761	26.572	1.88451	25.7023	2.59174	26.7707	4.27055
24.1352	5.48383	26.1	3.85562	26.2242	1.66018	26.8203	3.6237	26.0006	5.60382	25.7769	2.50261	26.7458	1.87427	25.8266	2.76918	26.9693	4.43372
24.185	5.57686	26.2491	4.13364	26.423	1.90565	26.9941	3.38753	26.1745	5.47198	25.926	2.32785	26.9445	1.87026	25.9757	2.6375	27.1183	4.18847
24.2348	5.55209	26.423	4.0186	26.572	2.01895	27.1183	3.20115	26.2987	5.8219	26.0503	2.43306	27.1183	1.92011	26.1248	2.81601	27.3169	4.09448
24.3094	5.55357	26.5968	4.07493	26.7707	1.78621	27.2672	3.56957	26.4478	5.67664	26.2242	2.48087	27.3169	1.7653	26.2739	2.71167	27.4906	3.97089
24.3841	5.43275	26.7707	3.97484	26.9197	1.86789	27.4658	3.4048	26.5968	5.54193	26.3484	2.536	27.5154	1.74487	26.423	2.81393	27.6643	4.31601
24.4588	5.56805	26.9197	4.02648	27.1183	1.81592	27.6395	3.34513	26.721	5.37124	26.5223	2.69113	27.6891	1.84591	26.572	2.76715	27.838	4.38133
24.5583	5.59409	27.0934	4.02023	27.292	1.77557	27.7883	3.36049	26.87	5.79067	26.6465	2.42198	27.8876	1.89054	26.721	2.84907	28.0116	4.17407
24.6827	5.52758	27.2424	3.76277	27.4658	1.72783	27.962	3.51245	27.0438	5.59756	26.8203	2.27963	28.0612	1.83732	26.87	2.81079	28.21	4.32079
24.7822	5.55944	27.4161	3.94523	27.6643	1.80285	28.1356	3.35328	27.1927	5.47383	26.9693	2.58467	28.2596	2.03404	27.019	2.70748	28.3588	4.39405
24.9066	5.6218	27.565	3.8829	27.838	1.86103	28.2844	3.68279	27.3665	5.65331	27.1431	2.49835	28.4332	1.72325	27.1927	2.90664	28.5572	4.42988
25.0061	5.48642	27.7635	4.08849	28.0116	1.91733	28.4332	3.6658	27.5154	5.86975	27.292	2.35783	28.6068	1.80883	27.3665	2.76168	28.7059	4.33161
25.1056	5.62635	27.8876	4.04725	28.21	1.74735	28.582	3.2789	27.6643	5.50965	27.4658	2.62958	28.8051	1.82346	27.5154	2.68922	28.9042	4.0771
25.2548	5.66006	28.086	3.91359	28.3588	1.67131	28.7803	3.21103	27.8132	5.30567	27.6147	2.34183	29.0034	1.7382	27.7139	2.77395	29.0777	4.15014
25.404	5.71207	28.21	3.71656	28.5572	1.75943	28.9786	3.47355	27.962	5.74905	27.7635	2.39507	29.2016	1.91206	27.8628	2.66644	29.2512	4.28223
25.5035	5.66162	28.3836	4.21677	28.7555	1.78605	29.0777	3.60666	28.1604	5.62852	27.9372	2.55581	29.3751	1.87173	28.0116	2.76562	29.4494	4.31088
25.6526	5.72247	28.5324	3.84074	28.929	1.82959	29.3007	3.21127	28.3092	5.72154	28.1108	2.55557	29.5485	1.77531	28.21	2.73636	29.6228	4.26356
25.8018	5.73532	28.6811	4.18625	29.1025	1.78882	29.4742	3.37797	28.458	5.3678	28.3092	2.53553	29.7466	1.806	28.3588	2.80275	29.7962	4.2785
25.9509	5.66411	28.8547	3.62852	29.3007	1.84438	29.598	3.32754	28.6068	5.84561	28.458	2.34675	29.92	1.74509	28.5572	2.50579	29.9695	4.2557
26.0751	5.3503	29.0282	4.06791	29.4742	1.89259	29.8209	3.15717	28.8051	5.71666	28.6068	2.51982	30.1181	1.85369	28.7059	2.72742	30.1428	4.20407
26.2491	5.72252	29.2016	4.0492	29.6476	1.86901	29.9447	3.62219	28.9538	5.52927	28.8051	2.39316	30.3161	1.94737	28.8794	2.7095	30.3409	4.12008
26.3981	5.55567	29.3503	4.20797	29.8457	1.8867	30.1428	3.42792	29.1273	5.44603	28.9538	2.49168	30.4894	1.80973	29.0529	2.64819	30.5142	4.17728
26.5223	5.37897	29.4989	3.92559	30.019	2.0222	30.3161	3.19326	29.3007	5.64883	29.1521	2.4606	30.6627	1.82352	29.2512	2.73854	30.6874	4.26306
26.6962	5.49166	29.6723	3.99217	30.1924	1.86844	30.4894	3.23473	29.4494	5.53281	29.3007	2.67298	30.8606	1.80332	29.3998	2.85278	30.8854	4.11302
26.8452	5.41505	29.8209	3.98529	30.3904	1.88998	30.6379	3.15917	29.6476	5.42686	29.4989	2.44031	31.0338	1.81775	29.598	2.7343	31.0586	4.3527
26.9941	5.69448	29.9943	4.29877	30.5884	1.66459	30.8111	3.3532	29.7962	5.47275	29.6723	2.544	31.2317	1.82759	29.7714	2.74045	31.2317	4.22464
27.1679	5.64751	30.1676	3.68872	30.7864	1.72398	30.9596	3.39481	29.9447	5.85489	29.8457	2.30428	31.4049	1.87497	29.9447	2.61704	31.4296	4.04584
27.3169	5.8607	30.3409	3.82728	30.9348	1.86546	31.0833	3.16813	30.1428	5.42067	30.0438	2.45022	31.578	1.83156	30.1428	2.77335	31.578	4.20677
27.4658	5.61547	30.5142	3.95752	31.1328	1.71018	31.3059	3.07419	30.2914	5.38842	30.1924	2.53219	31.7758	1.93481	30.3409	2.80144	31.7758	4.19472
27.6395	5.74178	30.6874	3.82803	31.3307	1.68532	31.479	3.59109	30.4894	5.74646	30.3904	2.43102	31.9488	1.97741	30.4894	2.76821	31.9736	4.19513
27.8132	5.56569	30.8359	4.01842	31.5038	1.651	31.6521	2.90321	30.6379	5.67892	30.5637	2.47095	32.1466	1.91219	30.6627	2.73272	32.1466	3.99854
27.9868	5.46699	30.9596	4.01729	31.6769	1.8282	31.8005	3.29784	30.8359	5.55901	30.7369	2.33667	32.3443	1.92017	30.8359	2.742	32.3196	3.95216
28.1356	5.71959	31.1575	3.92974	31.8747	1.72149	31.9488	2.95743	30.9843	5.55992	30.9348	2.36777	32.5173	1.88051	31.0338	2.61395	32.5173	4.04542
28.2844	5.59423	31.3307	4.09115	32.0724	1.92672	32.0972	3.43196	31.1822	5.73552	31.1328	2.32592	32.715	1.98653	31.2317	2.82193	32.6902	4.00567
28.458	5.40414	31.5038	3.91749	32.2702	1.80492	32.2949	3.4175	31.3307	5.59585	31.2812	2.39142	32.9126	1.9006	31.3801	2.80068	32.8632	4.06997
28.6316	5.56641	31.6027	4.02634	32.4184	1.73661	32.4432	3.1042	31.5285	5.4639	31.4543	2.57278	33.0855	1.96561	31.578	2.70902	33.0608	4.10207
28.8051	5.69768	31.7758	4.41154	32.6161	1.58159	32.5914	3.32568	31.6769	5.53078	31.6274	2.29226	33.283	1.91829	31.7511	2.73555	33.2583	4.13543
28.9538	5.63369	31.9983	3.74589	32.8138	1.76908	32.7644	3.24661	31.8747	5.47734	31.8252	2.47193	33.4559	1.95309	31.9241	2.84157	33.4312	4.19081
29.1273	5.52196	32.1466	3.65814	33.0114	1.69399	32.9867	3.17472	32.0477	5.49466	31.9983	2.46411	33.6287	1.91224	32.1219	2.80058	33.604	4.21313
29.3007	5.38024	32.3196	4.25419	33.209	1.90478	33.1102	3.07187	32.2207	5.39317	32.1713	2.40885	33.8262	2.04608	32.3196	2.8485	33.7521	4.2289
29.4494	5.56417	32.4926	3.68727	33.3571	1.61828	33.3077	3.15417	32.369	5.63109	32.369	2.54015	33.999	1.89442	32.5173	2.78186	33.9496	4.29616
29.6476	5.38413	32.6902	4.00906	33.5546	1.75691	33.4312	2.996	32.5667	5.38794	32.542	2.41785	34.1964	1.93012	32.6655	2.59557	34.147	4.06584
29.7962	5.45696	32.8385	3.85028	33.7521	1.85628	33.604	3.24794	32.7397	5.64168	32.7397	2.2369	34.3938	1.85596	32.8632	2.8442	34.3444	4.16827
29.9943	5.36226	33.0361	3.76862	33.9002	1.72191	33.7768	3.12726	32.9126	5.3026	32.9126	2.47076	34.5665	1.82115	33.0361	2.96957	34.4925	4.1629
30.1428	5.75648	33.1843	4.18884	34.0977	1.7302	33.9249	3.15559	33.1102	5.43292	33.1102	2.34797	34.7391	1.8813	33.209	2.76055	34.6898	4.12476
30.3409	5.67583	33.3324	4.10211	34.3198	1.6167	34.073	3.3399	33.2583	5.57461	33.283	2.43282	34.9365	1.9252	33.4065	2.73412	34.8871	4.04694
30.4894	5.60595	33.4806	4.0441	34.4925	1.59805	34.2457	3.04239	33.4559	5.46709	33.4559	2.43298	35.1091	1.9523	33.604	2.68604	35.0598	4.21155
30.6627	5.72919	33.6534	3.84321	34.6158	1.82353	34.4185	3.1702	33.6287	5.46747	33.6534	2.28881	35.3063	1.85999	33.7768	2.97878	35.2324	4.16452
30.8359	5.64511	33.8015	3.45649	34.8378	1.71821	34.5665	3.24177	33.8015	5.42813	33.8509	2.38779	35.4789	1.95376	33.9496	2.79985	35.4296	4.17392
31.0091	5.52771	33.9743	4.10863	35.0351	1.93959	34.7145	2.84276	33.9496	5.38228	33.999	2.32907	35.6761	2.01326	34.147	2.70281	35.6268	4.21145
31.1822	5.66526	34.147	3.86809	35.2324	1.72038	34.8871	2.89184	34.147	5.47035	34.1964	2.39518	35.8733	1.89046	34.3444	2.62497	35.7993	4.29027
31.3801	5.61914	34.3198	3.89517	35.4296	1.71773	35.0844	3.21454	34.3444	5.53981	34.3938	2.56317	36.0458	1.8997	34.4925	2.79213	35.9718	4.17094
31.5285	5.71172	34.4431	3.67718	35.6268	1.82116	35.257	3.04918	34.4925	5.39852	34.5911	2.30219	36.2182	2.00992	34.6898	2.8194	36.169	4.16831
31.6769	5.82957	34.6158	3.5936	35.7747	1.85379	35.4296	3.23601	34.6898	5.21879	34.7391	2.31473	36.4153	1.86485	34.8871	2.71989	36.3168	4.16722
31.8747	5.55501	34.8131	3.92942	35.9718	1.76292	35.6021	2.87716	34.8871	5.39526	34.9365	2.34175	36.6124	1.98538	35.0598	2.7158	36.5138	4.17933
32.0477	5.51388	35.0104	3.81324	36.169	1.57149	35.7747	3.04651	35.0351	5.39981	35.1337	2.42178	36.7848	2.00909	35.2817	2.81214	36.7109	4.30471
32.2207	5.70691	35.183	3.81642	36.3414	1.70046	35.9472	3.05956	35.2324	5.32361	35.3063	2.54168	36.9571	1.98996	35.4296	2.93041	36.9079	4.36123
32.4184	5.51802	35.331	3.92312	36.5138	1.81183	36.1197	3.67325	35.3803	5.49884	35.5035	2.51456	37.1541	1.8915	35.6268	2.70488	37.1049	4.14704
32.5667	5.28584	35.4789	3.69776	36.7109	1.98255	36.2675	2.89777	35.5775	5.67234	35.6761	2.46261	37.3264	1.99726	35.824	2.88054	37.2526	4.03594
32.7644	5.64142	35.6761	3.88656	36.9079	1.6025	36.4399	3.20658	35.75	5.478	35.8733	2.45543	37.5234	1.98404	36.0211	2.55434	37.4495	4.24924
32.9126	5.5124	35.8486	3.59802	37.1049	1.58474	36.6124	3.20485	35.9225	5.42351	36.0704	2.22757	37.6956	1.94909	36.1936	2.81096	37.6218	4.138
33.1102	5.377	35.9965	3.88828	37.3018	1.87569	36.8094	2.78103	36.1197	5.45238	36.2429	2.49666	37.8679	2.02558	36.366	2.81834	37.7941	3.97236
33.283	5.56433	36.1936	4.09393	37.4741	1.64133	36.9571	3.25989	36.2921	5.64403	36.4153	2.50055	38.0648	1.90188	36.5631	2.6437	37.9909	4.18862
33.4559	5.62296	36.3414	3.64602	37.6464	1.66141	37.1049	3.26899	36.4646	5.3783	36.6124	2.58193	38.2616	2.0132	36.7601	2.84869	38.1386	3.88777
33.6534	5.57546	36.5138	4.17447	37.8433	1.7842	37.3018	3.08063	36.6616	5.31346	36.8094	2.37193	38.4338	2.11334	36.9571	2.8574	38.3354	4.10623
33.8015	5.48377	36.6616	3.8231	38.0155	1.71401	37.4741	3.33785	36.8094	5.54536	36.9818	2.54354	38.6305	1.9535	37.1295	2.66702	38.5321	4.28796
33.999	5.5051	36.8586	3.58709	38.1878	1.79487	37.6464	2.95556	37.031	5.5235	37.1541	2.42307	38.8273	2.037	37.3018	2.7892	38.7043	4.20186
34.1717	5.60547	37.0064	3.80598	38.3846	1.74821	37.7941	2.73752	37.2034	5.34699	37.3511	2.33373	38.9994	2.06691	37.4988	2.63501	38.8764	4.08851
34.3444	5.5793	37.1541	3.68299	38.5813	1.5563	37.9417	3.14746	37.3757	5.14638	37.548	2.54437	39.1715	1.84418	37.6956	2.65522	39.0731	3.93499
34.5418	5.43016	37.3018	3.44491	38.7781	1.71381	38.1386	3.13601	37.548	5.38897	37.7203	2.53523	39.3681	1.94626	37.8433	2.644	39.2698	4.00496
34.6898	5.43959	37.4741	3.61092	38.9502	1.65788	38.3108	2.95944	37.7203	5.32998	37.8925	2.56404	39.5648	1.98741	38.0402	2.76155	39.4173	4.09031
34.8871	5.57081	37.6464	3.97929	39.1223	1.63697	38.483	3.2893	37.8925	5.50333	38.0894	2.36865	39.7614	2.0066	38.237	2.70169	39.6139	4.1689
35.0351	5.46085	37.7941	3.69331	39.319	1.60711	38.6305	2.91963	38.0894	5.32529	38.237	2.4755	39.9334	2.03428	38.4338	2.68333	39.8105	4.17773
35.2324	5.45439	37.9663	3.60079	39.5156	1.58359	38.8027	3.03423	38.237	5.45336	38.4338	2.51499	40.1054	1.93292	38.6059	2.67782	40.0071	4.16586
35.4296	5.58795	38.1386	3.82561	39.6876	1.65108	38.9502	3.3435	38.4338	5.3636	38.6305	2.44631	40.3019	1.94202	38.8027	2.57784	40.1545	4.13354
35.5775	5.5766	38.2862	3.65899	39.9088	1.79416	39.1223	3.07469	38.6305	5.45673	38.8273	2.38027	40.4984	2.0874	38.9748	2.84602	40.351	3.99717
35.7747	5.41054	38.4584	3.97434	40.0808	1.63286	39.2944	2.91264	38.8273	5.50367	39.024	2.37004	40.6949	1.89782	39.1715	2.47458	40.5475	4.13499
35.9718	5.61504	38.6305	4.27302	40.2528	1.47836	39.4665	3.09721	38.9748	5.43572	39.2206	2.27663	40.8422	1.95113	39.3681	2.67027	40.744	4.07877
36.1197	5.53138	38.7781	3.72145	40.4493	1.67833	39.6139	3.05286	39.1715	5.2465	39.3927	2.50031	41.0386	1.98157	39.5156	2.70478	40.9159	4.19438
36.3168	5.48019	38.9502	3.87247	40.6458	1.68916	39.8105	3.00153	39.3681	5.46258	39.5648	2.61191	41.235	2.03	39.7122	2.60449	41.0877	4.19006
36.4646	5.51855	39.1223	3.90394	40.8422	1.84304	39.9579	2.82935	39.5156	5.41683	39.7614	2.51771	41.4069	1.90057	39.9334	2.67234	41.2841	4.09955
36.6616	5.45448	39.2944	3.53246	41.0141	1.7877	40.1545	3.12094	39.7122	5.40587	39.9579	2.53515	41.6032	2.08671	40.1054	2.68544	41.4805	4.3402
36.834	5.56812	39.4665	3.67394	41.186	1.5978	40.3019	2.9105	39.8842	5.46948	40.1299	2.52882	41.775	1.92108	40.3019	2.86481	41.6523	4.0019
37.0064	5.27058	39.6139	3.90543	41.4069	1.5394	40.4984	2.72612	40.0562	5.25919	40.3019	2.4873	41.9713	2.02285	40.4984	2.68902	41.8241	4.10933
37.2034	5.38523	39.7859	3.57354	41.5787	1.80756	40.6949	2.84145	40.2528	5.16806	40.4984	2.37745	42.1676	1.92583	40.6703	2.72271	42.0204	4.13729
37.4003	5.70952	39.9334	3.69519	41.775	1.71561	40.8668	2.84329	40.4493	5.51436	40.6949	2.35518	42.3393	2.03653	40.8422	2.74742	42.2167	4.10681
37.548	5.60188	40.1054	3.78161	41.9713	1.76706	41.0386	2.92887	40.6212	5.41134	40.8913	2.40766	42.5356	2.1352	41.0386	2.70994	42.4129	4.02116
37.7449	5.52858	40.2528	3.93662	42.1431	1.65568	41.186	2.95467	40.7931	5.57317	41.0877	2.23953	42.7073	2.01629	41.235	2.67347	42.5846	4.0763
37.8925	5.43451	40.4247	3.93227	42.3639	1.79942	41.3578	3.09462	40.9895	5.39385	41.2596	2.32138	42.9035	1.97929	41.4314	2.6493	42.7808	4.01235
38.0894	5.1585	40.5966	3.88123	42.5111	1.824	41.5051	3.38325	41.1614	5.55359	41.4314	2.42766	43.0996	1.99609	41.5787	2.68292	42.9525	4.07565
38.2616	5.5293	40.7685	3.85291	42.7073	1.81585	41.6523	2.73238	41.3332	5.27994	41.6278	2.4375	43.2712	2.00951	41.775	2.60408	43.1487	4.19375
38.4338	5.40325	40.9404	3.98121	42.9035	1.87134	41.8486	3.25483	41.5296	5.29263	41.7996	2.50107	43.4674	2.03254	41.9713	2.67511	43.3203	3.8973
38.6305	5.31571	41.1123	4.07078	43.0996	1.72937	42.0204	2.59659	41.7259	5.39021	41.9959	2.42851	43.6389	1.92739	42.1676	2.5937	43.5164	3.98454
38.7781	5.5807	41.2596	3.772	43.2958	1.58152	42.1676	2.90424	41.8732	5.43188	42.1922	2.36741	43.835	2.14528	42.3639	2.65898	43.688	4.03817
38.9748	5.41222	41.4314	3.91998	43.4674	1.58332	42.3148	3.13163	42.0695	5.48527	42.3884	2.13184	44.0311	1.98213	42.5356	2.75656	43.884	4.0277
39.1715	5.54087	41.5787	3.55308	43.6635	1.90172	42.4865	2.51869	42.2412	5.13203	42.5601	2.3444	44.2026	1.97174	42.7318	2.70299	44.0556	4.06068
39.319	5.53008	41.775	3.81189	43.835	1.91036	42.6582	3.15867	42.4129	5.55282	42.7563	2.40931	44.3986	1.986	42.9035	2.77793	44.2271	4.14907
39.5156	5.74131	41.9468	4.05947	44.0311	1.85704	42.8054	2.96329	42.6092	5.35621	42.928	2.41228	44.5701	2.0935	43.1241	2.76625	44.4231	4.14242
39.6876	5.37374	42.1186	3.60973	44.2271	1.77074	43.0015	2.99156	42.8054	5.34296	43.1241	2.12291	44.7905	1.86397	43.2958	2.66175	44.5946	4.0819
39.8597	5.27643	42.2903	3.85022	44.3986	1.80532	43.1487	3.06744	42.9525	5.42866	43.3203	2.26082	44.9375	1.98894	43.4919	2.65166	44.7905	3.96
40.0562	5.42953	42.4375	3.67914	44.5701	1.66801	43.3448	2.99503	43.1487	5.28055	43.4919	2.40533	45.1334	1.99032	43.688	2.55749	44.962	4.1148
40.2528	5.562	42.6092	4.24247	44.766	1.69707	43.4919	3.1453	43.3448	5.47579	43.688	2.4853	45.3293	1.99743	43.8595	2.56018	45.1579	3.93444
40.4001	5.51259	42.7563	3.4879	44.962	1.84834	43.688	2.80623	43.4919	5.34749	43.884	2.34995	45.5007	1.98145	44.0311	2.52913	45.3538	3.86681
40.5966	5.58131	42.9525	3.63049	45.1579	1.75772	43.835	3.22757	43.688	5.51874	44.0801	2.4101	45.721	1.97037	44.2271	2.64449	45.5251	4.06476
40.7931	5.42443	43.0996	3.60178	45.3538	1.52302	44.0066	2.82202	43.884	5.50053	44.2761	2.123	45.9168	1.89731	44.4231	2.61695	45.721	4.10389
40.9404	5.54003	43.2467	4.08852	45.5251	1.57455	44.1781	2.77815	44.0311	5.06658	44.4476	2.25347	46.1126	1.95293	44.5946	2.61092	45.8923	3.98284
41.1368	5.51313	43.4183	3.90458	45.721	1.79483	44.3741	2.84997	44.2271	5.311	44.6191	2.3234	46.3329	1.9274	44.7905	2.65986	46.0881	4.03166
41.3087	5.56149	43.5899	3.76591	45.9168	1.81128	44.5211	2.74308	44.4231	5.23401	44.815	2.40076	46.5531	1.91478	44.9865	2.57449	46.2839	4.21219
41.4805	5.69233	43.737	3.89126	46.0881	1.8502	44.6925	3.27977	44.5701	5.00202	45.0109	2.18362	46.7488	1.88043	45.1824	2.67274	46.4552	3.73799
41.6769	5.37194	43.9085	3.68229	46.2839	1.84574	44.864	3.16641	44.7905	5.35618	45.2068	2.26564	46.9934	2.0888	45.3538	2.51532	46.6754	3.99429
41.8486	5.54061	44.1291	3.83577	46.4797	1.86513	45.0354	2.74618	44.962	5.17058	45.3782	2.37382	47.1891	1.974	45.5496	2.54877	46.8222	4.00898
42.0204	5.48251	44.2761	3.65129	46.6754	1.74339	45.2068	3.16818	45.1579	5.34014	45.5496	2.27174	47.3848	1.87158	45.7455	2.64292	47.0179	3.94573
42.2167	5.55827	44.4476	3.95358	46.8467	1.61092	45.4027	3.26336	45.3048	5.33008	45.7455	2.51812	47.5804	1.90824	45.9413	2.54265	47.2136	3.91842
42.3884	5.36983	44.6191	3.82844	47.0423	1.90716	45.5496	2.8394	45.5007	5.19035	45.9413	2.17441	47.776	1.89377	46.1371	2.61089	47.4092	4.16225
42.5601	5.45471	44.7905	3.80945	47.238	1.86264	45.721	2.91689	45.6965	5.28826	46.1371	2.18601	47.9716	1.98498	46.3329	2.54641	47.5559	3.92878
42.7563	5.41311	44.962	3.83461	47.4092	1.86179	45.8923	2.85577	45.8434	5.18416	46.3329	2.20354	48.1672	1.96112	46.5041	2.49706	47.7515	3.96987
42.9525	5.38197	45.1334	3.66688	47.6048	1.66421	46.0392	3.11185	46.0392	5.5114	46.5041	2.088	48.3627	1.89264	46.6999	2.56292	47.9471	4.02715
43.0996	5.467	45.3048	4.08209	47.8005	2.04634	46.235	2.88342	46.2594	5.34013	46.6999	2.16332	48.5582	1.9555	46.8711	2.61378	48.1427	4.09156
43.2958	5.48584	45.4517	3.67986	47.996	1.89308	46.3818	2.91533	46.4307	5.35289	46.8956	2.39504	48.7537	1.84412	47.0668	2.63405	48.2894	4.00103
43.4919	5.41198	45.6231	4.01284	48.1916	1.89801	46.5531	3.07632	46.6265	5.1038	47.0668	2.06863	48.9492	1.89693	47.2625	2.69423	48.4849	3.82097
43.6389	5.36401	45.7944	3.7688	48.3627	1.69178	46.7733	2.84768	46.7733	5.25294	47.2625	2.20086	49.1447	2.13718	47.4581	2.66356	48.6804	4.03028
43.835	5.39587	45.9902	3.9587	48.5582	1.73408	46.92	2.93051	46.969	5.32804	47.4581	2.26841	49.3401	1.92096	47.6293	2.52534	48.8759	3.97468
44.0311	5.56779	46.1371	3.72023	48.7537	1.80811	47.1157	3.26677	47.1646	5.30537	47.6537	2.33151	49.5356	1.94881	47.8249	2.60134	49.047	3.83794
44.1781	5.42477	46.2839	4.12157	48.9248	1.67314	47.2625	2.48886	47.3358	5.44976	47.8005	2.28131	49.731	1.93478	48.0205	2.7149	49.218	3.9784
44.3741	5.39048	46.4552	4.06657	49.1203	1.81063	47.4581	3.11817	47.507	5.47857	47.996	2.14753	49.9263	1.88005	48.1916	2.68072	49.4134	4.07274
44.5701	5.83257	46.6265	4.01565	49.3157	1.80292	47.6048	2.91442	47.7027	5.27907	48.1916	2.23985	50.1217	2.11361	48.3871	2.50975	49.6088	3.84842
44.717	5.42876	46.8222	3.77302	49.5111	1.67332	47.8005	2.87961	47.8982	5.24493	48.3871	2.26178	50.2926	1.81472	48.5582	2.60612	49.7798	4.0301
44.913	5.27835	47.0179	3.69591	49.6821	1.61164	47.9716	2.7608	48.0449	5.38484	48.5827	2.3623	50.488	1.89645	48.7537	2.57269	49.9752	4.07843
45.1089	5.57253	47.1646	3.72594	49.8775	1.77647	48.1183	3.03442	48.2405	5.22276	48.7537	2.20801	50.6589	1.94798	48.9248	2.43687	50.1461	4.12427
45.2803	5.33224	47.3114	3.59307	50.0484	1.6541	48.2894	2.96527	48.436	5.3092	48.9492	2.20201	50.8541	1.92388	49.1447	2.55414	50.3171	3.9
45.4517	5.32255	47.507	3.59301	50.2438	1.70862	48.4849	3.06494	48.6071	5.32587	49.1203	2.01226	51.0494	1.97005	49.3157	2.41145	50.488	4.17855
45.6475	5.60009	47.6537	3.81254	50.4391	1.88889	48.6316	2.82047	48.7782	5.20651	49.3157	2.23163	51.2447	1.99083	49.5111	2.58164	50.7077	3.94064
45.7944	5.52884	47.8005	4.14548	50.6344	1.74114	48.827	2.81962	48.9737	5.57374	49.5111	2.1656	51.4399	1.98319	49.7065	2.56953	50.8786	4.0604
45.9902	5.40797	47.9716	3.68272	50.8053	1.84663	48.9981	2.86951	49.1691	5.37244	49.7065	2.09161	51.6107	2.14053	49.9019	2.47179	51.0738	4.03265
46.186	5.5476	48.1427	3.56251	50.9762	1.77194	49.1447	3.08167	49.3401	5.14468	49.9019	2.17141	51.8059	1.95441	50.0973	2.58476	51.2691	3.93598
46.3329	5.40727	48.3138	3.40451	51.1959	1.7239	49.389	2.90046	49.5111	5.19521	50.0973	2.23224	52.0011	1.91166	50.2926	2.27665	51.4155	4.02104
46.5286	5.50784	48.4849	3.84344	51.3911	1.71844	49.5111	2.90486	49.7065	5.31234	50.2438	2.17399	52.1962	1.93164	50.4391	2.47765	51.6107	4.12805
46.7243	5.56649	48.656	3.36057	51.5619	1.4467	49.6821	2.86037	49.9019	5.3076	50.4147	2.29225	52.3914	1.98316	50.6344	2.35464	51.8059	4.03253
46.8956	5.53713	48.827	3.65373	51.7571	1.96517	49.8531	3.14595	50.0484	5.24344	50.6344	2.11128	52.5621	1.88005	50.8297	2.37723	52.0011	4.43703
47.0668	5.50041	48.9981	3.66796	51.9523	1.88393	49.9996	2.9609	50.2438	5.11773	50.8297	2.35788	52.7572	1.99014	51.0006	2.41434	52.1719	4.19034
47.2625	5.6779	49.1691	3.80913	52.1475	1.6979	50.1705	3.03081	50.4147	5.22571	51.0006	2.41709	52.9523	2.04992	51.2203	2.29311	52.3426	4.12077
47.4092	5.5435	49.3401	3.88254	52.3182	1.72134	50.3659	3.09845	50.5856	5.28936	51.2203	2.09381	53.1474	2.03889	51.4155	2.27061	52.5377	4.33369
47.6048	5.51453	49.5111	4.14028	52.5377	1.58293	50.5368	2.85675	50.7809	5.10149	51.4155	2.17263	53.3181	2.02375	51.5863	2.42567	52.7328	4.02448
47.8005	5.44423	49.6577	3.65095	52.7328	1.79396	50.7077	2.81068	50.9762	5.17609	51.5863	2.18658	53.5131	2.1118	51.7571	2.28152	52.9279	4.04997
47.9716	5.41316	49.8042	3.92119	52.9035	1.76676	50.8786	2.72518	51.147	5.00991	51.7571	2.19612	53.7081	1.91142	51.9523	2.57172	53.123	3.99103
48.1427	5.468	49.9996	3.3919	53.0986	1.90053	51.0738	2.58206	51.3179	5.31015	51.9523	2.09925	53.8788	1.99008	52.1475	2.44506	53.2937	4.13255
48.3383	5.35626	50.195	3.63035	53.2693	1.83995	51.2203	3.07526	51.5131	4.86332	52.1475	2.18332	54.0737	1.98987	52.3426	2.31746	53.4643	4.2506
48.5338	5.322	50.3903	3.76973	53.4643	1.54853	51.3911	2.89443	51.7083	5.14312	52.3426	2.0439	54.2687	2.00606	52.5377	2.56701	53.6594	4.17921
48.6804	5.34224	50.5856	3.5977	53.6594	1.79021	51.5619	2.80717	51.9035	5.22061	52.5377	2.07728	54.4637	1.99676	52.7328	2.24646	53.8544	3.75468
48.8759	5.45168	50.7321	3.75369	53.8544	1.72762	51.7571	2.38349	52.0499	5.38889	52.7085	2.13722	54.6342	1.97499	52.9279	2.36988	54.025	4.05925
49.047	5.57062	50.9274	3.42971	54.0494	1.86634	51.9279	2.97053	52.245	5.37378	52.9279	2.14832	54.8535	2.04867	53.123	2.33503	54.22	4.11536
49.2424	5.49486	51.0738	3.78828	54.22	1.93718	52.0743	3.23479	52.4402	5.11673	53.123	2.23163	55.0241	1.83928	53.3181	2.29133	54.3906	3.92351
49.4134	5.16925	51.2447	3.79859	54.4149	1.84859	52.245	2.75094	52.6353	5.47934	53.3181	2.18789	55.219	1.86762	53.4887	2.35576	54.5855	3.85941
49.6088	5.41303	51.4155	3.73687	54.6342	1.87037	52.4402	2.72709	52.7816	5.15892	53.4643	2.09543	55.4138	1.81432	53.6838	2.23287	54.7804	4.06832
49.7554	5.4093	51.6107	3.49105	54.8048	1.75637	52.6353	2.91973	52.9767	5.24314	53.6594	2.25656	55.5843	1.87414	53.8788	2.39847	54.951	4.04797
49.9508	5.25053	51.7571	3.51181	54.9754	1.8104	52.7816	2.82555	53.1718	5.33449	53.8544	2.007	55.7792	1.87218	54.0494	2.3097	55.1215	3.95961
50.1461	5.36742	51.9279	3.94404	55.1702	1.43461	52.9523	2.89734	53.3424	5.14673	54.0494	2.1773	55.974	1.92071	54.2444	2.20899	55.3164	4.16416
50.2926	5.152	52.0987	3.41222	55.3651	1.61769	53.123	2.7623	53.5131	5.41462	54.22	2.27484	56.1445	1.98162	54.4393	2.4156	55.5113	4.11894
50.4391	5.46962	52.2694	3.83027	55.56	1.51394	53.2693	3.01714	53.7081	5.09076	54.4393	2.16042	56.3393	1.77242	54.6342	2.3973	55.7061	4.09337
50.6589	5.35683	52.4402	3.43547	55.7548	1.60722	53.4643	2.82623	53.9031	5.11822	54.6099	1.86758	56.5341	1.95866	54.8292	2.28437	55.901	4.18472
50.8297	5.39196	52.6353	3.43423	55.9497	1.77389	53.6594	2.60735	54.0981	5.23048	54.7804	2.05673	56.7045	1.85536	54.9997	2.29615	56.0714	4.08257
51.025	5.24609	52.7816	3.67549	56.1201	1.84235	53.8056	2.93898	54.2444	5.1582	54.9754	2.12766	56.8992	1.87672	55.1702	2.32116	56.2662	4.10054
51.1714	5.16	52.9767	3.38693	56.2906	1.75991	54.0006	2.62671	54.4393	5.14676	55.1702	2.22365	57.094	1.8653	55.3651	2.347	56.4367	3.90206
51.3667	5.61874	53.123	3.24528	56.4854	1.90279	54.1469	2.48365	54.6342	5.08999	55.3651	2.10823	57.2644	1.91441	55.5843	2.28524	56.6315	4.13318
51.5619	5.41297	53.2937	3.70937	56.6801	1.8715	54.3418	2.61714	54.8292	5.32827	55.56	2.04062	57.4834	1.80305	55.7792	2.29802	56.8262	4.06235
51.7327	5.43298	53.4643	3.52874	56.8749	1.68916	54.488	2.80984	54.9754	4.98462	55.7548	2.06856	57.6538	1.84644	55.974	2.23127	56.9966	3.90984
51.9035	5.25282	53.6594	3.52407	57.0696	1.75498	54.683	2.51245	55.1702	4.96422	55.9497	2.17181	57.8485	1.85839	56.1445	2.36588	57.1914	4.13158
52.0987	5.19504	53.8056	3.55535	57.3131	1.91566	54.8292	2.89775	55.3651	5.00023	56.1201	2.13674	58.0188	1.81229	56.3393	2.20025	57.3617	4.18806
52.2938	5.28852	53.9519	3.47152	57.4591	1.50865	54.9997	2.71391	55.56	5.1937	56.3149	2.17472	58.2135	1.79767	56.5341	2.19916	57.5564	3.91717
52.4402	5.33325	54.1469	3.40435	57.6538	1.54151	55.1459	2.88422	55.7061	5.00301	56.5097	2.15032	58.4081	1.98665	56.7288	2.18764	57.7511	3.91973
52.6353	5.17983	54.3418	3.48183	57.8485	1.62538	55.3164	2.79272	55.901	5.06894	56.7045	2.25319	58.6027	1.91339	56.8992	2.24439	57.9458	3.98638
52.8304	5.4081	54.5124	3.40273	58.0188	1.68022	55.5113	3.02531	56.0958	5.11936	56.8749	2.13021	58.773	1.79006	57.094	2.19468	58.0918	3.86642
52.9767	5.13606	54.683	3.536	58.2378	1.78829	55.6574	2.82719	56.2906	5.06354	57.0696	1.89442	58.9676	1.81632	57.2887	2.29742	58.2865	3.87373
53.1718	5.30733	54.8535	3.85759	58.4081	1.76201	55.8523	3.06712	56.4367	4.82371	57.2644	2.18249	59.1622	1.77345	57.4591	2.17302	58.4811	3.96937
53.3668	5.29267	55.0241	3.5723	58.6027	1.78559	56.0471	2.60402	56.6315	4.80854	57.4591	2.17297	59.3568	1.85969	57.6538	2.11133	58.6757	3.94605
53.5375	5.16667	55.1702	3.56419	58.7974	1.66421	56.1932	2.86123	56.8262	5.11571	57.6294	2.27071	59.5514	1.75909	57.8728	2.0835	58.8703	3.82268
53.7081	5.20654	55.3408	3.45375	58.992	1.67198	56.388	2.91026	57.021	4.8323	57.8241	2.06295	59.7216	1.78244	58.0431	2.0388	59.0406	3.98218
53.9031	5.50177	55.5113	3.51361	59.1865	1.99278	56.5341	2.55306	57.2157	4.75316	58.0188	2.19511	59.9161	1.84555	58.2378	2.00762	59.2352	4.10067
54.0737	5.39785	55.6574	3.33973	59.3811	1.76675	56.6801	2.55198	57.3617	4.8851	58.2135	2.12351	60.1107	1.79703	58.4081	2.09162	59.4298	4.06488
54.2687	5.15029	55.8523	3.56239	59.5514	1.57063	56.8749	2.48162	57.5564	4.88785	58.3838	1.96066	60.3052	1.81353	58.6027	2.12282	59.6	4.023
54.4393	5.15392	55.9984	3.4295	59.7459	1.66445	57.0696	2.54381	57.7511	4.84507	58.5784	2.32338	60.4997	1.73347	58.8217	2.1198	59.7945	3.94766
54.6342	5.2314	56.1932	3.96811	59.9404	1.60646	57.2157	3.1556	57.9458	4.96777	58.773	2.00245	60.6698	1.79204	59.0163	2.14063	59.9648	4.25589
54.7804	5.26872	56.3393	3.47001	60.135	1.49476	57.4104	2.52175	58.0918	4.89381	58.9676	2.18652	60.8643	1.85609	59.1865	2.13195	60.1593	4.11633
54.9754	5.25049	56.5097	3.40056	60.3295	1.65545	57.5564	2.83542	58.2865	4.91522	59.1622	2.16311	61.0588	1.63044	59.3811	2.1671	60.3538	4.02463
55.1702	5.35125	56.6801	3.5208	60.524	1.7554	57.7511	2.65448	58.4811	4.88541	59.3568	2.23563	61.2289	1.76658	59.5757	2.19496	60.5483	3.95842
55.3408	5.31694	56.8749	3.18983	60.7185	1.67853	57.9458	2.80696	58.6514	4.97461	59.5514	1.94466	61.4234	1.78095	59.7459	2.11942	60.7185	4.00285
55.5113	5.30615	57.0696	3.28225	60.9129	1.80505	58.1161	3.2451	58.846	4.83229	59.7216	2.17247	61.6178	1.62107	59.9404	2.02738	60.9129	3.99834
55.6574	5.17082	57.2157	3.30545	61.1074	1.6534	58.2865	3.26403	59.0163	4.79343	59.9404	2.14273	61.8122	1.83914	60.135	2.13006	61.1074	3.95979
55.8523	5.08187	57.4104	3.4416	61.2775	1.76579	58.5054	2.67989	59.2109	5.11168	60.1107	2.02517	61.9823	1.75335	60.3538	2.08705	61.3018	3.9831
56.0471	4.91208	57.5808	3.37491	61.4963	1.52645	58.6757	2.72124	59.3811	4.89266	60.3052	2.1118	62.1767	1.69799	60.524	2.17835	61.472	3.82922
56.2419	5.15935	57.7511	3.49581	61.6664	1.65366	58.8217	2.73047	59.5514	4.95501	60.4997	1.9807	62.3711	1.48946	60.7185	2.11793	61.6664	3.72976
56.388	5.33769	57.8971	3.61206	61.8608	1.817	58.992	2.53378	59.7459	5.13317	60.7185	2.15716	62.5655	1.53044	60.9129	1.99431	61.8851	3.80766
56.5828	5.16222	58.0675	3.4075	62.0795	1.61111	59.1622	2.75304	59.9404	4.74684	60.8886	2.03658	62.7598	1.78753	61.1074	2.18865	62.0309	3.87091
56.7532	5.16397	58.2378	2.87823	62.2496	1.81594	59.3325	2.60329	60.135	4.92061	61.0588	2.1863	62.9299	1.61392	61.3018	2.13313	62.2253	3.88931
56.9236	5.27334	58.4324	3.42127	62.444	1.75073	59.5027	3.00387	60.3295	4.80136	61.2775	2.06588	63.1	1.63705	61.472	1.8569	62.4197	3.75345
57.1183	5.13266	58.5784	3.07544	62.6141	1.652	59.6486	2.54117	60.4754	4.82181	61.4477	1.97829	63.2943	1.60713	61.6664	2.18536	62.6141	3.87038
57.2887	5.12478	58.773	3.3475	62.7841	1.5605	59.8432	2.61474	60.6698	4.82563	61.6907	1.92263	63.4886	1.64884	61.8851	1.84654	62.7598	4.09593
57.4834	5.10242	58.9676	3.46772	62.9785	1.85439	60.0134	2.95281	60.8643	4.69819	61.8365	2.13521	63.6586	1.58971	62.0795	2.06554	62.9542	3.87378
57.6538	4.90926	59.1379	3.599	63.1971	1.50046	60.2322	3.11809	61.0588	4.80353	62.0309	1.90693	63.8529	1.5577	62.2739	1.95717	63.1485	3.78962
57.8485	5.23018	59.3082	3.50376	63.3914	1.35498	60.3781	2.96389	61.2046	4.81008	62.2253	1.93083	64.0472	1.56346	62.444	2.00698	63.3429	3.90964
58.0188	5.35659	59.5027	3.27254	63.5615	1.52084	60.5483	2.68144	61.3991	4.46837	62.4197	1.9326	64.2415	1.56998	62.6141	2.00592	63.5372	3.68612
58.1891	5.15875	59.6973	3.3732	63.7801	1.73728	60.7185	2.7063	61.5935	4.58846	62.6141	2.0932	64.4358	1.53238	62.8084	2.10149	63.7072	3.89567
58.3838	5.12967	59.8675	3.31361	63.9744	1.52394	60.9129	2.92137	61.7636	4.67493	62.7841	1.98921	64.6058	1.63026	63.0028	2.08206	63.9015	4.01122
58.5298	5.1725	60.0377	3.6417	64.1444	1.40241	61.0831	2.84228	61.958	4.68991	62.9785	1.82921	64.8	1.45796	63.1728	2.0187	64.0958	4.00388
58.7244	5.04074	60.2079	3.4296	64.3387	1.61835	61.2532	2.6567	62.1281	4.60782	63.1485	1.80019	64.9943	1.41706	63.3672	1.93955	64.2658	3.79397
58.919	5.09065	60.4024	3.4404	64.5086	1.48669	61.3991	2.32807	62.3225	4.67023	63.3672	1.73624	65.1885	1.54035	63.5615	2.04667	64.4601	3.82121
59.1136	5.21631	60.5483	3.41576	64.7272	1.52895	61.5935	2.3871	62.5169	4.72325	63.5372	1.69675	65.3827	1.4385	63.7801	1.88547	64.6543	3.58643
59.2595	5.19434	60.7185	3.4738	64.8971	1.43586	61.7879	2.78344	62.6627	4.66995	63.7315	1.63076	65.577	1.46449	63.9744	1.73556	64.8486	3.88043
59.4541	5.13728	60.8643	3.1071	65.0914	1.48042	61.9337	2.81704	62.857	4.41073	63.9258	1.65754	65.7712	1.6603	64.1687	1.81437	65.0185	3.8669
59.6	4.94824	61.0588	3.20329	65.2856	1.50465	62.1281	2.40194	63.0271	4.68409	64.1201	1.89259	65.9411	1.42901	64.3629	1.9567	65.2128	3.68043
59.8189	5.14315	61.2046	3.16877	65.5041	1.61627	62.3225	2.97894	63.2214	4.72234	64.3144	1.7347	66.1353	1.30532	64.5572	1.98049	65.3827	3.72129
60.0377	4.90414	61.3748	3.3303	65.6741	1.62099	62.5169	3.02508	63.3914	4.79871	64.5086	1.71878	66.3052	1.39046	64.7515	1.70638	65.6012	3.69444
60.1836	4.91106	61.5935	3.14664	65.8683	1.46844	62.687	2.86053	63.5858	4.53561	64.7029	1.6855	66.4994	1.35139	64.9457	1.73448	65.7712	3.76173
60.3538	5.13693	61.7393	3.33006	66.0625	1.52046	62.857	2.7903	63.7801	4.51817	64.8729	1.46835	66.6935	1.27102	65.1399	1.81716	65.9654	3.83149
60.4997	4.89486	61.9337	3.18834	66.2566	1.6332	63.0514	2.4211	63.9501	4.49603	65.0914	1.88545	66.8877	1.48878	65.3342	1.5803	66.1353	3.69053
60.7185	4.95857	62.1038	3.31613	66.4508	1.443	63.1971	2.34538	64.1444	4.55557	65.2856	1.66214	67.0818	1.27641	65.5284	1.76647	66.3295	3.67922
60.8886	4.99051	62.2739	3.50769	66.645	1.35302	63.3672	2.50658	64.3144	4.53311	65.4798	1.58488	67.2517	1.27182	65.6983	1.67321	66.5236	3.76951
61.0588	4.9661	62.4197	3.26108	66.8392	1.45045	63.5372	2.62366	64.5086	4.27249	65.6741	1.33807	67.4701	1.20149	65.8925	1.5299	66.7178	3.53026
61.2532	4.91861	62.6141	3.30601	67.0333	1.53541	63.7072	2.49379	64.6786	4.10191	65.8683	1.6165	67.64	1.25596	66.0867	1.64189	66.8877	3.68529
61.4234	4.93613	62.7841	3.16535	67.2274	1.52021	63.8772	2.50079	64.8486	4.48035	66.0382	1.34387	67.8341	1.46483	66.2809	1.46167	67.0818	3.24551
61.6178	4.94644	62.9542	3.27614	67.4216	1.26775	64.0715	3.04142	65.0428	4.19394	66.2324	1.42561	68.0282	1.43545	66.4751	1.50945	67.276	3.42427
61.7879	4.84742	63.1242	3.05642	67.6157	1.33656	64.2172	2.38676	65.2371	4.46475	66.4265	1.26354	68.2223	1.1204	66.6693	1.50937	67.4701	3.3304
61.9823	5.10157	63.3186	3.02996	67.8098	1.34742	64.4115	2.34973	65.4313	4.31031	66.6207	1.3032	68.4164	1.13489	66.8634	1.50502	67.64	3.49531
62.1767	4.95712	63.4886	3.20768	68.004	1.07846	64.6058	2.34459	65.6255	4.16367	66.8149	1.21947	68.6105	1.0718	67.0576	1.44596	67.8098	2.94285
62.3225	4.9603	63.6586	3.21131	68.1981	1.27925	64.7515	2.68396	65.7954	4.10042	67.009	1.32405	68.7804	1.05651	67.276	1.25622	68.004	3.2045
62.4683	4.93848	63.8287	3.27368	68.3922	1.26272	64.9457	2.5381	65.9654	4.12608	67.2032	1.24071	68.9744	1.19972	67.4459	1.19998	68.1981	3.28833
62.687	4.84421	64.0229	3.15312	68.5863	1.23684	65.0914	2.63311	66.1595	4.07685	67.3973	1.14672	69.1685	0.92267	67.6157	1.19584	68.3922	3.21043
62.857	4.85371	64.2172	3.05106	68.7804	1.25022	65.2856	2.62031	66.3537	4.24097	67.5672	1.13752	69.3383	1.03094	67.8341	1.21034	68.5863	3.15681
63.0514	4.95601	64.3629	3.11568	68.9744	1.16928	65.4798	2.68635	66.5479	4.04064	67.7613	1.16337	69.5324	0.83858	68.004	1.15909	68.7804	3.20101
63.2214	5.10687	64.5572	2.73257	69.1685	0.81402	65.6498	2.42739	66.7178	4.19614	67.9554	0.95811	69.7264	0.71477	68.2223	1.00838	68.9744	3.05814
63.3914	4.86688	64.7272	2.94146	69.3383	1.02518	65.8197	2.2337	66.912	4.0555	68.1738	0.88667	69.8962	0.86054	68.3922	0.92465	69.12	2.99245
63.5858	4.68858	64.8971	2.85083	69.5566	1.04041	66.0139	2.2062	67.0818	4.04967	68.3679	0.99334	70.0903	0.74509	68.6105	0.94104	69.3141	2.71875
63.7801	4.76845	65.0914	3.00646	69.7507	0.5084	66.1595	2.15427	67.276	3.99522	68.562	0.75709	70.2843	0.68887	68.8046	0.73262	69.5081	2.65157
63.9258	4.66474	65.2371	3.29492	69.9447	0.80652	66.3537	2.29994	67.4459	3.92286	68.7561	0.89006	70.4784	0.72751	69.023	0.69305	69.7022	2.83172
64.1201	4.72879	65.4313	2.92307	70.1388	0.75083	66.5479	2.25826	67.6157	3.64233	68.9259	0.61499	70.6724	0.57346	69.1685	0.5741	69.8962	2.60821
64.3144	4.87047	65.577	3.37085	70.3328	0.67717	66.7178	2.59564	67.8098	3.80686	69.12	0.54275	70.8422	0.55105	69.3868	0.28623	70.0903	2.6015
64.4601	4.76184	65.7712	3.11451	70.5269	0.39483	66.8877	2.45273	68.004	3.70005	69.3141	0.32061	71.0362	0.38256	69.5809	0.5081	70.2601	2.58869
64.6543	4.43205	65.9168	2.7729	70.7209	0.67184	67.1304	2.14115	68.1981	3.64304	69.5081	0.29111	71.2302	0.20521	69.7507	0.1956	70.4298	2.26455
64.8486	4.94759	66.111	2.8143	70.9149	0.24439	67.276	1.81841	68.3679	3.48253	69.7022	0.371	71.4242	0.24457	69.969	0.25378	70.6239	2.24308
65.0185	4.7461	66.3052	2.74583	71.1089	0.25863	67.4459	2.08669	68.562	3.24071	69.8962	-0.01362	71.6182	0.20568	70.1631	0.0209	70.8179	2.21662
65.2128	4.80576	66.4508	3.2914	71.3029	0.11122	67.6157	1.99585	68.7318	3.56433	70.0903	-0.06518	71.8122	0.18518	70.3328	-0.11325	71.0119	2.27167
65.3827	4.74182	66.645	3.05567	71.4969	-0.01352	67.8098	2.26868	68.9259	3.58303	70.3086	-0.13035	72.0062	0.0151	70.5269	-0.26347	71.1817	1.87369
65.577	4.63616	66.8392	3.15545	71.6909	-0.08913	67.9554	2.28412	69.0957	3.21461	70.5026	-0.49828	72.1759	-0.21243	70.7209	-0.32555	71.3514	1.93178
65.7712	4.42257	66.9848	3.01035	71.8849	-0.0105	68.1496	2.02916	69.2655	3.39672	70.6966	-0.58256	72.3699	-0.23497	70.9149	-0.46423	71.5697	1.75818
65.9411	4.55069	67.1789	3.01888	72.0789	-0.51882	68.3194	2.06644	69.4596	3.05495	70.8907	-0.61074	72.5639	-0.35715	71.1089	-0.7965	71.7395	1.66951
66.111	4.40466	67.3731	2.52098	72.2729	-0.40834	68.5378	1.7605	69.6537	2.8995	71.0604	-0.79919	72.7579	-0.31086	71.3029	-0.65157	71.9334	1.49059
66.3052	4.29479	67.5187	2.98247	72.4427	-0.63521	68.7076	1.81905	69.8477	3.25517	71.2787	-0.78362	72.9519	-0.50451	71.5212	-0.9204	72.1274	1.44116
66.4994	4.6471	67.7128	2.82186	72.6609	-1.0864	68.8774	1.9889	70.0175	2.93248	71.4727	-0.99461	73.1458	-0.83015	71.7152	-1.13623	72.2972	1.18614
66.645	4.46342	67.8826	2.51432	72.8549	-0.90208	69.0472	1.75964	70.1873	2.54059	71.6667	-1.12734	73.3398	-0.67984	71.9092	-1.30802	72.4912	1.13198
66.8392	4.52327	68.0525	2.93386	73.0488	-1.09795	69.217	1.78517	70.3813	2.64768	71.8365	-1.28401	73.5095	-0.90756	72.1032	-1.31142	72.6852	0.92563
67.0333	4.40908	68.2466	2.78531	73.2428	-1.42334	69.4111	2.10312	70.5754	2.62889	72.0304	-1.60824	73.7035	-0.96363	72.2972	-1.64759	72.8791	0.6037
67.2032	4.18628	68.3922	2.68376	73.4368	-1.42237	69.5809	1.88257	70.7694	2.22073	72.2244	-1.69567	73.8974	-1.26063	72.4669	-1.90758	73.0488	0.30203
67.3731	4.46337	68.5863	2.7436	73.6307	-1.51501	69.7507	1.72372	70.9634	2.37404	72.4427	-1.97029	74.0914	-1.23098	72.6852	-1.95011	73.2428	0.44371
67.5672	4.19634	68.7318	2.31438	73.8247	-2.01953	69.9447	1.73484	71.1574	2.23532	72.6366	-2.38237	74.2853	-1.44429	72.8791	-2.20729	73.4368	0.06959
67.7613	4.2575	68.9259	2.51989	73.9944	-2.30904	70.0903	1.70181	71.3272	1.87174	72.8064	-2.2666	74.455	-1.53642	73.0488	-2.33748	73.6307	-0.00505
67.9069	4.23627	69.12	2.77289	74.2126	-2.26902	70.2843	1.34795	71.4969	2.02748	73.0004	-2.35008	74.6732	-1.80276	73.2671	-2.67567	73.8247	-0.37057
68.101	3.97877	69.2898	2.58343	74.4066	-2.53369	70.4541	1.77897	71.6909	2.01495	73.2186	-2.79514	74.8672	-2.02246	73.461	-2.84579	73.9944	-0.5661
68.2951	4.06177	69.4596	2.32044	74.6005	-2.82638	70.6239	1.19114	71.8849	1.42868	73.4125	-2.97158	75.0369	-2.18221	73.655	-3.1787	74.1641	-0.81538
68.4892	3.97048	69.6052	2.46041	74.7944	-2.96788	70.8179	1.15194	72.0304	1.23496	73.6065	-2.93693	75.2066	-2.32394	73.8247	-3.27293	74.3581	-1.23032
68.6348	4.07485	69.8235	2.24303	74.9884	-3.2703	70.9877	0.88305	72.2244	0.87238	73.8005	-3.4254	75.4248	-2.44066	74.0429	-3.42273	74.552	-1.21869
68.8289	3.84768	69.9933	2.48884	75.1096	-3.36749	71.2059	1.18225	72.4184	0.91677	73.9944	-3.71808	75.6187	-2.79852	74.2368	-3.69548	74.746	-1.87676
69.023	4.07706	70.1631	2.55591	75.352	-3.6026	71.3757	0.69701	72.5882	0.32921	74.1641	-3.72328	75.7884	-2.99929	74.4308	-3.96314	74.9399	-1.8201
69.1685	4.00099	70.3328	2.15991	75.546	-3.91095	71.5697	0.97262	72.7821	0.47888	74.3823	-4.13339	75.9823	-2.96381	74.6247	-3.99841	75.1339	-2.23599
69.3626	3.79243	70.4784	2.66404	75.7641	-3.99896	71.7395	0.82051	72.9761	0.20872	74.5763	-4.24714	76.1762	-3.29808	74.8429	-4.2918	75.3278	-2.43064
69.5324	3.63606	70.6724	2.24867	75.9581	-4.30409	71.8849	0.86777	73.1458	0.07289	74.7944	-4.50605	76.3702	-3.43502	75.0126	-4.22638	75.4975	-2.68944
69.7022	3.61955	70.8422	2.15428	76.152	-4.55696	72.0789	0.98825	73.3398	-0.38842	74.9641	-4.92258	76.5641	-3.69178	75.1823	-4.52217	75.6914	-2.81878
69.8962	3.28966	71.0119	2.24595	76.3459	-4.71724	72.2487	0.20132	73.5338	-0.43345	75.1339	-5.03551	76.758	-3.70315	75.3763	-5.05939	75.8611	-3.52072
70.0903	3.54558	71.2059	1.82575	76.5399	-4.88027	72.4184	0.3469	73.7035	-0.55429	75.3278	-5.26412	76.9277	-4.2236	75.5944	-5.00344	76.055	-3.80774
70.2601	3.37643	71.3757	1.98757	76.7338	-4.94017	72.6124	0.04254	73.8732	-0.87176	75.546	-5.3866	77.1216	-4.41441	75.7884	-5.07465	76.249	-3.95172
70.4298	3.50329	71.5455	1.82853	76.9035	-5.45364	72.7821	0.01322	74.0671	-1.29459	75.7399	-5.71393	77.3156	-4.58938	75.9823	-5.34883	76.4429	-4.22466
70.6239	3.21973	71.7395	1.47014	77.0974	-5.48256	72.9519	0.29624	74.2611	-1.77123	75.9338	-5.75589	77.5095	-4.62673	76.1762	-5.46746	76.6368	-4.66483
70.8179	3.18758	71.9092	1.66732	77.2913	-5.92048	73.1458	-0.38352	74.455	-1.97442	76.1278	-5.8574	77.7034	-4.694	76.3944	-5.71044	76.8065	-5.04102
70.9634	2.83738	72.0789	1.24233	77.4852	-5.91729	73.2913	-0.31991	74.649	-2.20199	76.3459	-6.27617	77.8731	-5.03066	76.5641	-5.96133	77.0004	-5.29638
71.1574	3.09129	72.2729	1.52173	77.7034	-5.9419	73.4853	-0.17676	74.8187	-2.54195	76.5156	-6.46719	78.0912	-5.20415	76.758	-5.74393	77.1701	-5.2649
71.3514	2.84849	72.4184	1.08245	77.8973	-6.15144	73.6792	-1.01884	75.0126	-2.68539	76.7095	-6.40803	78.2609	-5.25232	76.952	-6.03466	77.364	-5.65761
71.4969	2.55292	72.6124	1.19925	78.0912	-6.56215	73.8489	-0.40896	75.1823	-3.12822	76.9035	-6.68414	78.4548	-5.56562	77.1216	-6.43181	77.558	-6.10187
71.6909	2.37744	72.8064	0.84009	78.2852	-6.71404	74.0187	-0.44003	75.3763	-3.26031	77.1216	-6.9075	78.6488	-5.63665	77.3398	-6.24542	77.7519	-6.17924
71.8849	2.28865	72.9519	1.0794	78.4791	-6.6958	74.1884	-0.87695	75.546	-3.46968	77.3156	-6.98415	78.8185	-5.8365	77.558	-6.34619	77.9458	-6.73701
72.0789	2.40308	73.1458	0.11931	78.6488	-6.88554	74.3581	-1.56968	75.7399	-4.133	77.4852	-7.10844	79.0124	-5.83021	77.7519	-6.52303	78.0912	-6.71383
72.2244	2.03041	73.3398	0.83804	78.8669	-6.9031	74.552	-1.20523	75.9096	-4.55659	77.6792	-7.45373	79.2063	-6.13257	77.9216	-6.693	78.2852	-7.08726
72.4184	1.91231	73.4853	0.12393	79.0609	-6.99048	74.7217	-1.80461	76.1035	-4.72972	77.8973	-7.48962	79.4002	-6.22034	78.1397	-6.65662	78.5033	-7.13488
72.6124	1.88871	73.6792	0.67315	79.2305	-7.1598	74.8914	-1.8705	76.2974	-5.04258	78.067	-7.46311	79.5941	-6.3151	78.2852	-6.94181	78.673	-7.67139
72.7821	1.39153	73.8732	0.32466	79.4487	-7.14183	75.0854	-1.68868	76.4914	-5.33864	78.2852	-7.76953	79.7881	-6.33993	78.5033	-6.95749	78.8669	-7.87338
72.9519	1.43879	74.0671	0.13404	79.6184	-7.29187	75.2793	-1.76283	76.6611	-5.84476	78.4548	-7.73564	79.982	-6.60675	78.6973	-7.11765	79.0366	-8.05873
73.1458	1.24255	74.2611	0.22837	79.8365	-7.59592	75.4732	-2.16347	76.8307	-5.9633	78.673	-7.96607	80.1517	-6.63282	78.8912	-6.98625	79.2548	-8.24104
73.3398	0.74096	74.455	-0.35333	80.0305	-7.72685	75.6187	-2.71751	77.0247	-6.16249	78.8669	-7.96155	80.3456	-6.87663	79.0851	-7.18843	79.4002	-8.40689
73.5095	0.70646	74.6005	-0.78025	80.2244	-7.84369	75.8126	-3.24217	77.2186	-6.53666	79.0609	-8.18114	80.5395	-6.78989	79.3033	-7.14476	79.5941	-8.87585
73.6792	0.38997	74.7702	-0.52585	80.3941	-7.84443	76.0066	-3.19484	77.4125	-7.05079	79.2548	-7.99618	80.7335	-7.02701	79.4972	-7.34628	79.7881	-8.65293
73.8732	0.02184	74.9641	-0.93396	80.588	-8.02529	76.2005	-3.36089	77.6064	-7.09537	79.4487	-8.08783	80.9274	-7.01259	79.6911	-7.37031	79.982	-8.90208
74.0671	0.00173	75.1581	-0.75373	80.8062	-7.86079	76.3459	-3.50745	77.8004	-7.55266	79.6426	-8.24292	81.1213	-7.0437	79.8608	-7.23492	80.1759	-9.12454
74.2368	-0.19232	75.3278	-1.38861	80.9759	-7.92654	76.5399	-3.62064	77.9458	-7.67549	79.8365	-8.27248	81.291	-7.11919	80.0789	-7.35741	80.3456	-9.37265
74.4066	-0.72873	75.5217	-1.59524	81.1941	-8.09749	76.7095	-3.87536	78.1397	-8.03906	80.0305	-8.2011	81.485	-7.34737	80.2729	-7.30392	80.5395	-9.19834
74.6005	-0.77274	75.6672	-1.41061	81.3395	-7.94662	76.8792	-4.27007	78.3336	-8.13628	80.2244	-8.45877	81.6547	-7.36433	80.4668	-7.50116	80.7335	-9.71671
74.7702	-1.28171	75.8611	-2.15729	81.5577	-8.16957	77.0732	-4.68297	78.5276	-8.5045	80.4183	-8.56093	81.8486	-7.46994	80.6365	-7.45458	80.9032	-9.729
74.9399	-1.84228	76.0066	-1.8161	81.7516	-7.93068	77.2671	-4.65253	78.6973	-8.70963	80.6123	-8.22993	82.0426	-7.47726	80.8304	-7.53202	81.0971	-9.62092
75.1339	-1.76429	76.1762	-2.41041	81.9456	-8.14925	77.4125	-4.74008	78.8669	-8.81498	80.8062	-8.5148	82.2365	-7.58685	81.0486	-7.52752	81.291	-9.86014
75.3035	-2.15558	76.3702	-2.65221	82.1153	-8.28106	77.6064	-4.8315	79.0609	-9.19155	81.0001	-8.52923	82.4305	-7.49221	81.2425	-7.82328	81.485	-9.67042
75.4732	-2.49478	76.5399	-2.94668	82.3092	-8.4507	77.8004	-4.97888	79.2548	-9.19785	81.1941	-8.64318	82.6244	-7.55766	81.4122	-7.7676	81.6789	-10.1456
75.6672	-2.72362	76.7095	-3.33975	82.5274	-8.1307	77.97	-4.92397	79.4245	-9.55558	81.388	-8.63648	82.7941	-7.40285	81.6062	-7.63648	81.8728	-10.1516
75.8369	-2.97486	76.9035	-2.86493	82.6971	-8.35384	78.164	-5.45575	79.6426	-9.49629	81.5819	-8.68659	82.9881	-7.57741	81.8001	-7.66532	82.0183	-10.1936
76.0066	-3.2752	77.0732	-3.38248	82.8911	-8.46521	78.3336	-5.55804	79.7881	-9.73248	81.7759	-8.77544	83.182	-7.76961	81.9941	-7.75581	82.2123	-10.1084
76.2247	-3.70618	77.2671	-3.18948	83.0851	-8.3796	78.5276	-5.76294	79.982	-9.88654	81.9698	-8.76347	83.376	-7.80924	82.2123	-7.74551	82.4062	-10.3144
76.3944	-3.9871	77.4125	-3.57608	83.279	-8.3418	78.7215	-5.88556	80.1759	-9.91166	82.1638	-8.75608	83.57	-7.79792	82.382	-7.70124	82.6002	-10.2372
76.5883	-4.49119	77.6307	-4.13811	83.473	-8.44818	78.9154	-6.2567	80.3698	-10.062	82.3577	-8.61566	83.764	-7.71619	82.5759	-7.82525	82.7941	-10.4017
76.7338	-4.87398	77.8004	-4.01965	83.667	-8.34512	79.0609	-6.34739	80.5395	-10.4318	82.5517	-8.67877	83.9579	-7.83175	82.7699	-7.75532	82.9881	-10.6505
76.9277	-5.24836	77.97	-3.89777	83.8609	-8.18862	79.2548	-6.54764	80.7335	-10.4296	82.7456	-8.84238	84.1519	-7.84828	82.9881	-7.81287	83.182	-10.482
77.0974	-5.54192	78.1397	-4.53129	84.0549	-8.24642	79.4487	-6.27068	80.9032	-10.4677	82.9396	-8.46618	84.3459	-7.73112	83.182	-7.8959	83.3518	-10.3645
77.2671	-5.66583	78.3094	-4.78738	84.2489	-8.48269	79.6184	-6.54776	81.0971	-10.5402	83.1336	-8.84255	84.5156	-8.01916	83.3518	-7.91027	83.5457	-10.4104
77.461	-6.29308	78.4791	-5.21261	84.4429	-8.55216	79.8123	-6.45879	81.291	-10.4072	83.3275	-8.75085	84.7096	-7.95634	83.5457	-7.84296	83.7155	-10.4973
77.6307	-6.32274	78.6488	-5.36754	84.6369	-8.5038	79.982	-6.74462	81.4607	-10.4268	83.5215	-8.76274	84.9036	-7.87577	83.7397	-7.71016	83.9094	-10.6073
77.8246	-6.62695	78.8185	-5.36192	84.8309	-8.49196	80.1759	-6.72583	81.6547	-10.6793	83.7155	-8.7586	85.0734	-7.9824	83.9337	-7.78742	84.1034	-10.6535
77.9943	-7.14451	79.0124	-5.52604	85.0249	-8.51833	80.3698	-7.38256	81.8244	-10.5343	83.9094	-8.8415	85.2917	-7.82335	84.1519	-7.80946	84.2974	-10.8632
78.1882	-7.4466	79.1821	-5.54904	85.2189	-8.40282	80.5153	-6.73951	82.0183	-10.9878	84.1034	-8.81339	85.4614	-7.82889	84.3217	-7.95015	84.4914	-10.6833
78.3821	-7.66872	79.3517	-6.12144	85.4129	-8.46282	80.7092	-7.21669	82.2123	-10.7988	84.2974	-8.95113	85.6554	-7.79299	84.5156	-7.98238	84.6854	-10.5853
78.5276	-7.72695	79.4972	-5.93677	85.6069	-8.65203	80.8547	-7.2959	82.382	-10.8125	84.4671	-8.8101			84.7096	-7.83763	84.9036	-10.8503
78.7215	-7.91292	79.6911	-6.21919	85.8009	-8.54022	81.0486	-6.94145	82.5759	-10.8824	84.6854	-8.79486			84.9279	-7.92871	85.0491	-10.8371
78.9154	-8.34254	79.8608	-6.2675			81.2425	-7.52576	82.7699	-11.1524	84.9036	-8.69505			85.0976	-7.58919	85.2431	-10.4578
79.0851	-8.20834	80.0305	-6.36219			81.4122	-7.89831	82.9396	-11.1262	85.0734	-9.03588			85.2917	-7.9984	85.4129	-10.8285
79.2548	-8.69163	80.2244	-6.09082			81.5819	-6.88087	83.1336	-10.9388	85.2674	-9.02754			85.4857	-7.80519	85.6069	-10.7465
79.4487	-9.0293	80.3698	-6.16301			81.7516	-7.61355	83.279	-11.2227	85.4614	-8.96796			85.6797	-7.78697	85.8009	-10.825
79.6426	-9.21137	80.5638	-6.31894			81.9456	-7.39254	83.473	-10.9377	85.6312	-8.86573			85.8737	-7.79498
79.8365	-9.30538	80.7335	-7.04712			82.1153	-7.18583	83.667	-11.3313	85.8252	-8.76792
79.982	-9.26552	80.9032	-6.78914			82.285	-7.90368	83.8609	-10.803
80.1759	-9.54143	81.0971	-7.28456			82.4547	-7.48827	84.0549	-11.124
80.3698	-9.6485	81.291	-6.65488			82.6487	-7.63156	84.2247	-11.3358
80.5395	-10.0408	81.4365	-7.20195			82.8184	-7.67957	84.3944	-11.1483
80.7092	-10.027	81.6304	-7.18052			83.0366	-7.86795	84.5884	-11.0219
80.9032	-10.2379	81.7759	-7.04344			83.2063	-7.66513	84.7824	-11.3021
81.0971	-10.4242	81.9698	-6.92862			83.376	-7.62021	84.9764	-11.1567
81.2668	-10.3158	82.1153	-7.4469			83.57	-7.6307	85.1461	-11.1848
81.4607	-10.6002	82.3092	-7.58052			83.764	-8.0633	85.9222	-11.201
81.6304	-10.4281	82.5032	-7.60326			83.9337	-8.04335
81.8244	-10.6794	82.6729	-7.43519			84.1034	-7.46063
82.0183	-10.9252	82.8426	-7.66399			84.2974	-7.5927
82.188	-10.7065	83.0123	-8.16307			84.4914	-8.10026
82.3577	-10.9577	83.182	-7.17643			84.6369	-7.94213
82.5517	-11.0007	83.376	-7.47642			84.8309	-7.69203
82.7456	-10.9001	83.5215	-7.48884			84.9764	-7.9533
82.8911	-11.1998	83.7397	-7.10063			85.1704	-8.351
83.0851	-10.984	83.9094	-7.8194			85.3644	-7.86205
83.279	-11.3213	84.0549	-7.83549			85.5099	-8.2238
83.4488	-11.2646	84.2489	-7.90069			85.7039	-7.99972
83.6185	-11.4452	84.4429	-7.86254
83.8125	-11.2266	84.5884	-7.61389
84.0064	-11.3211	84.7824	-7.42966
84.8309	-11.2034	84.9279	-7.60187
84.9521	-11.1888	85.1219	-7.97641
85.0491	-11.5305	85.2917	-7.84136
85.1461	-11.3221	85.5827	-7.57441
85.2917	-11.5384	85.7039	-7.36869
85.3644	-11.257	85.7282	-7.61338
85.4614	-11.5209	85.7767	-8.30018
85.5099	-11.4747
85.5584	-11.6175
85.5827	-11.6451
85.5827	-11.3745
85.6069	-11.2951

## Sheet: NORMALIZE
DesAb-HETLTLR		DesAb-FETLTLR		DesAb-AETLTLR		DesAb-HETLNLV		DesAb-FETLNLV		DesAb-RVIAHQELK		DesAb-IAHQELK		DesAb-FAHQELT		DesAb-FAHQELK
Temperature(C)	CircularDichroism (mdeg)	Temperature(C)	CircularDichroism (mdeg)	Temperature(C)	CircularDichroism (mdeg)	Temperature(C)	CircularDichroism (mdeg)	Temperature(C)	CircularDichroism (mdeg)	Temperature(C)	CircularDichroism (mdeg)	Temperature(C)	CircularDichroism (mdeg)	Temperature(C)	CircularDichroism (mdeg)	Temperature(C)	CircularDichroism (mdeg)
24.6578	0.986173	23.2884	0.97281	24.0605	0.967262	24.9812	0.968566	24.7573	0.983866	24.5832	0.97482	24.2099	0.961301	24.6827	0.972446	24.7325	0.987331
24.5583	0.984988	23.5874	0.969066	24.2099	0.995924	25.0807	0.983121	24.832	0.984685	24.6329	0.98616	24.4339	0.987287	24.7076	0.97511	24.9315	1
24.4588	0.986024	23.8862	0.978171	24.3841	0.978469	25.2299	0.968949	24.8817	0.999151	24.6827	0.979923	24.6329	0.958676	24.7325	0.979821	25.0559	0.988563
24.3841	0.990808	24.1352	0.986011	24.5334	0.970982	25.3294	0.96035	24.9315	0.993658	24.7325	0.989542	24.832	0.983931	24.7822	0.988102	25.2299	0.988866
24.185	0.970255	24.3343	0.982964	24.6827	0.973839	25.4537	0.977621	24.9812	0.99377	24.8071	0.98072	25.031	0.97389	24.8817	0.990457	25.3791	0.984815
24.1352	0.988397	24.5334	0.961093	24.8569	0.98278	25.6029	0.979425	25.0807	0.981306	24.8817	0.992306	25.2051	0.969568	24.9315	0.976068	25.578	0.988363
24.0605	0.984337	24.7325	0.97023	25.031	0.972213	25.752	0.973764	25.2051	0.974056	24.9812	0.976717	25.4289	0.966233	25.031	0.987266	25.752	0.9793
24.0356	0.991371	24.9066	0.979584	25.1802	0.983584	25.8515	0.976527	25.3045	0.977599	25.0559	0.996342	25.6278	0.982659	25.1056	0.994641	25.926	0.978164
24.0107	0.975909	25.2051	0.973377	25.3294	0.988342	26.0503	1	25.404	1	25.1553	0.985845	25.8018	0.976884	25.2051	0.97993	26.1	0.99157
24.0107	0.976185	25.3543	0.973628	25.5283	0.960807	26.1994	0.958765	25.5035	0.980037	25.2797	0.98715	26.0006	0.977275	25.3294	0.981187	26.2739	0.968917
24.0107	0.978127	25.578	0.980152	25.6775	1	26.3484	0.969841	25.6526	0.997084	25.404	0.995134	26.1994	0.979522	25.4537	0.982383	26.4478	0.983345
24.0605	0.986266	25.752	0.976079	25.8763	0.974965	26.5471	0.979763	25.7769	0.974802	25.5283	0.987505	26.3733	0.96814	25.5532	0.974472	26.6217	0.989063
24.0854	0.987565	25.926	0.968007	26.0503	0.96192	26.6465	0.981241	25.9012	0.979626	25.6526	0.979234	26.572	0.974345	25.7023	0.964741	26.7707	0.987757
24.1352	0.978472	26.1	0.956267	26.2242	0.957673	26.8203	0.992081	26.0006	0.983521	25.7769	0.983924	26.7458	0.973337	25.8266	0.980906	26.9693	0.998407
24.185	0.983786	26.2491	0.978138	26.423	0.980469	26.9941	0.972515	26.1745	0.975866	25.926	0.969022	26.9445	0.972943	25.9757	0.96891	27.1183	0.9824
24.2348	0.982371	26.423	0.969088	26.572	0.990991	27.1183	0.957074	26.2987	0.996183	26.0503	0.977994	27.1183	0.977847	26.1248	0.985172	27.3169	0.976265
24.3094	0.982456	26.5968	0.97352	26.7707	0.969377	27.2672	0.987597	26.4478	0.987749	26.2242	0.98207	27.3169	0.962617	26.2739	0.975667	27.4906	0.968199
24.3841	0.975554	26.7707	0.965646	26.9197	0.976962	27.4658	0.973946	26.5968	0.979927	26.3484	0.986772	27.5154	0.960607	26.423	0.984982	27.6643	0.990724
24.4588	0.983283	26.9197	0.969708	27.1183	0.972136	27.6395	0.969002	26.721	0.970017	26.5223	1	27.6891	0.970547	26.572	0.980721	27.838	0.994987
24.5583	0.98477	27.0934	0.969217	27.292	0.968389	27.7883	0.970275	26.87	0.994369	26.6465	0.977049	27.8876	0.974938	26.721	0.988184	28.0116	0.98146
24.6827	0.980971	27.2424	0.948963	27.4658	0.963955	27.962	0.982865	27.0438	0.983157	26.8203	0.96491	28.0612	0.969702	26.87	0.984696	28.21	0.991036
24.7822	0.982791	27.4161	0.963317	27.6643	0.970922	28.1356	0.969678	27.1927	0.975973	26.9693	0.990922	28.2596	0.989056	27.019	0.975285	28.3588	0.995818
24.9066	0.986353	27.565	0.958413	27.838	0.976325	28.2844	0.996977	27.3665	0.986394	27.1431	0.983561	28.4332	0.95848	27.1927	0.993428	28.5572	0.998156
25.0061	0.97862	27.7635	0.974586	28.0116	0.981554	28.4332	0.995569	27.5154	0.998961	27.292	0.971578	28.6068	0.966899	27.3665	0.980223	28.7059	0.991742
25.1056	0.986613	27.8876	0.971342	28.21	0.965768	28.582	0.963515	27.6643	0.978053	27.4658	0.994751	28.8051	0.968339	27.5154	0.973622	28.9042	0.975131
25.2548	0.988539	28.086	0.960827	28.3588	0.958706	28.7803	0.957892	27.8132	0.96621	27.6147	0.970214	29.0034	0.959951	27.7139	0.98134	29.0777	0.979898
25.404	0.99151	28.21	0.945328	28.5572	0.96689	28.9786	0.979642	27.962	0.991953	27.7635	0.974754	29.2016	0.977055	27.8628	0.971546	29.2512	0.988519
25.5035	0.988628	28.3836	0.984678	28.7555	0.969362	29.0777	0.99067	28.1604	0.984955	27.9372	0.988461	29.3751	0.973088	28.0116	0.980582	29.4494	0.990389
25.6526	0.992104	28.5324	0.955097	28.929	0.973405	29.3007	0.957912	28.3092	0.990356	28.1108	0.98844	29.5485	0.963602	28.21	0.977916	29.6228	0.987301
25.8018	0.992838	28.6811	0.982277	29.1025	0.969619	29.4742	0.971723	28.458	0.969817	28.3092	0.986731	29.7466	0.966621	28.3588	0.983964	29.7962	0.988276
25.9509	0.98877	28.8547	0.938402	29.3007	0.974779	29.598	0.967545	28.6068	0.997559	28.458	0.970634	29.92	0.960628	28.5572	0.956912	29.9695	0.986788
26.0751	0.970844	29.0282	0.972967	29.4742	0.979256	29.8209	0.95343	28.8051	0.990072	28.6068	0.985392	30.1181	0.971313	28.7059	0.977102	30.1428	0.983418
26.2491	0.992107	29.2016	0.971496	29.6476	0.977066	29.9447	0.991956	28.9538	0.979192	28.8051	0.974591	30.3161	0.980529	28.8794	0.975469	30.3409	0.977936
26.3981	0.982575	29.3503	0.983986	29.8457	0.978709	30.1428	0.975861	29.1273	0.974359	28.9538	0.982992	30.4894	0.966988	29.0529	0.969884	30.5142	0.981669
26.5223	0.972482	29.4989	0.961771	30.019	0.991293	30.3161	0.95642	29.3007	0.986134	29.1521	0.980342	30.6627	0.968345	29.2512	0.978115	30.6874	0.987268
26.6962	0.978919	29.6723	0.967009	30.1924	0.977013	30.4894	0.959856	29.4494	0.979398	29.3007	0.998452	30.8606	0.966357	29.3998	0.988522	30.8854	0.977475
26.8452	0.974543	29.8209	0.966468	30.3904	0.979014	30.6379	0.953596	29.6476	0.973246	29.4989	0.978612	31.0338	0.967777	29.598	0.977728	31.0586	0.993119
26.9941	0.990505	29.9943	0.991129	30.5884	0.958082	30.8111	0.969671	29.7962	0.975911	29.6723	0.987454	31.2317	0.968745	29.7714	0.978289	31.2317	0.98476
27.1679	0.987822	30.1676	0.943138	30.7864	0.963598	30.9596	0.973118	29.9447	0.998098	29.8457	0.967012	31.4049	0.973406	29.9447	0.967046	31.4296	0.97309
27.3169	1	30.3409	0.954038	30.9348	0.976737	31.0833	0.954338	30.1428	0.972887	30.0438	0.979457	31.578	0.969136	30.1428	0.981286	31.578	0.983594
27.4658	0.985991	30.5142	0.964283	31.1328	0.962316	31.3059	0.946556	30.2914	0.971015	30.1924	0.986447	31.7758	0.979293	30.3409	0.983845	31.7758	0.982808
27.6395	0.993207	30.6874	0.954097	31.3307	0.960007	31.479	0.98938	30.4894	0.991802	30.3904	0.97782	31.9488	0.983485	30.4894	0.980817	31.9736	0.982834
27.8132	0.983148	30.8359	0.969074	31.5038	0.95682	31.6521	0.93239	30.6379	0.987881	30.5637	0.981225	32.1466	0.977068	30.6627	0.977584	32.1466	0.970003
27.9868	0.97751	30.9596	0.968985	31.6769	0.973276	31.8005	0.965084	30.8359	0.980919	30.7369	0.969774	32.3443	0.977853	30.8359	0.97843	32.3196	0.966976
28.1356	0.991939	31.1575	0.962098	31.8747	0.963366	31.9488	0.936882	30.9843	0.980972	30.9348	0.972426	32.5173	0.973951	31.0338	0.966765	32.5173	0.973063
28.2844	0.984778	31.3307	0.974796	32.0724	0.982426	32.0972	0.976196	31.1822	0.991167	31.1328	0.968857	32.715	0.984382	31.2317	0.985711	32.6902	0.970469
28.458	0.97392	31.5038	0.961134	32.2702	0.971114	32.2949	0.974998	31.3307	0.983058	31.2812	0.974443	32.9126	0.975928	31.3801	0.983775	32.8632	0.974665
28.6316	0.983189	31.6027	0.969697	32.4184	0.964771	32.4432	0.949042	31.5285	0.975397	31.4543	0.989908	33.0855	0.982324	31.578	0.975425	33.0608	0.976761
28.8051	0.990688	31.7758	1	32.6161	0.950374	32.5914	0.967391	31.6769	0.97928	31.6274	0.965987	33.283	0.977668	31.7511	0.977842	33.2583	0.978938
28.9538	0.987032	31.9983	0.947635	32.8138	0.967786	32.7644	0.96084	31.8747	0.976177	31.8252	0.981308	33.4559	0.981092	31.9241	0.9875	33.4312	0.982552
29.1273	0.98065	32.1466	0.940732	33.0114	0.960813	32.9867	0.954884	32.0477	0.977183	31.9983	0.980641	33.6287	0.977073	32.1219	0.983766	33.604	0.984009
29.3007	0.972554	32.3196	0.987622	33.209	0.980388	33.1102	0.946363	32.2207	0.97129	32.1713	0.975929	33.8262	0.99024	32.3196	0.988132	33.7521	0.985039
29.4494	0.983061	32.4926	0.943023	33.3571	0.953782	33.3077	0.953182	32.369	0.985104	32.369	0.987125	33.999	0.97532	32.5173	0.982061	33.9496	0.989428
29.6476	0.972776	32.6902	0.968338	33.5546	0.966656	33.4312	0.940078	32.5667	0.970987	32.542	0.976697	34.1964	0.978832	32.6655	0.96509	34.147	0.974396
29.7962	0.976937	32.8385	0.955847	33.7521	0.975884	33.604	0.96095	32.7397	0.985719	32.7397	0.961266	34.3938	0.971536	32.8632	0.98774	34.3444	0.981081
29.9943	0.971527	33.0361	0.949423	33.9002	0.963405	33.7768	0.950952	32.9126	0.966032	32.9126	0.981208	34.5665	0.968111	33.0361	0.999161	34.4925	0.980731
30.1428	0.994047	33.1843	0.982481	34.0977	0.964175	33.9249	0.953299	33.1102	0.973598	33.1102	0.970738	34.7391	0.974029	33.209	0.98012	34.6898	0.978241
30.3409	0.98944	33.3324	0.975658	34.3198	0.953635	34.073	0.968569	33.2583	0.981825	33.283	0.977973	34.9365	0.978348	33.4065	0.977712	34.8871	0.973162
30.4894	0.985448	33.4806	0.971094	34.4925	0.951903	34.2457	0.943921	33.4559	0.975582	33.4559	0.977987	35.1091	0.981014	33.604	0.973332	35.0598	0.983906
30.6627	0.992488	33.6534	0.955291	34.6158	0.972843	34.4185	0.95451	33.6287	0.975604	33.6534	0.965693	35.3063	0.971933	33.7768	1	35.2324	0.980837
30.8359	0.987685	33.8015	0.924869	34.8378	0.963062	34.5665	0.960439	33.8015	0.97332	33.8509	0.974133	35.4789	0.981158	33.9496	0.9837	35.4296	0.98145
31.0091	0.980978	33.9743	0.976171	35.0351	0.983621	34.7145	0.927382	33.9496	0.970658	33.999	0.969126	35.6761	0.987012	34.147	0.97486	35.6268	0.9839
31.1822	0.988836	34.147	0.957248	35.2324	0.963263	34.8871	0.931448	34.147	0.975771	34.1964	0.974763	35.8733	0.97493	34.3444	0.967769	35.7993	0.989044
31.3801	0.986201	34.3198	0.959378	35.4296	0.963017	35.0844	0.958183	34.3444	0.979804	34.3938	0.989088	36.0458	0.975839	34.4925	0.982997	35.9718	0.981256
31.5285	0.99149	34.4431	0.94223	35.6268	0.972623	35.257	0.944483	34.4925	0.971601	34.5911	0.966834	36.2182	0.986683	34.6898	0.985481	36.169	0.981084
31.6769	0.998222	34.6158	0.935655	35.7747	0.975653	35.4296	0.959962	34.6898	0.961166	34.7391	0.967903	36.4153	0.972411	34.8871	0.976416	36.3168	0.981013
31.8747	0.982538	34.8131	0.962073	35.9718	0.967214	35.6021	0.930232	34.8871	0.971412	34.9365	0.970207	36.6124	0.984269	35.0598	0.976043	36.5138	0.981803
32.0477	0.980188	35.0104	0.952933	36.169	0.949436	35.7747	0.944262	35.0351	0.971676	35.1337	0.977032	36.7848	0.986601	35.2817	0.984819	36.7109	0.989987
32.2207	0.991215	35.183	0.953183	36.3414	0.961413	35.9472	0.945343	35.2324	0.967252	35.3063	0.987256	36.9571	0.984719	35.4296	0.995594	36.9079	0.993675
32.4184	0.980425	35.331	0.961577	36.5138	0.971756	36.1197	0.996187	35.3803	0.977426	35.5035	0.984943	37.1541	0.975033	35.6268	0.975048	37.1049	0.979696
32.5667	0.967162	35.4789	0.943849	36.7109	0.987611	36.2675	0.931939	35.5775	0.987499	35.6761	0.980513	37.3264	0.985437	35.824	0.991051	37.2526	0.972444
32.7644	0.987474	35.6761	0.958701	36.9079	0.952316	36.4399	0.957524	35.75	0.976216	35.8733	0.979901	37.5234	0.984137	36.0211	0.961334	37.4495	0.986366
32.9126	0.980104	35.8486	0.936002	37.1049	0.950667	36.6124	0.95738	35.9225	0.973052	36.0704	0.960471	37.6956	0.980698	36.1936	0.984712	37.6218	0.979106
33.1102	0.972369	35.9965	0.958836	37.3018	0.977687	36.8094	0.922268	36.1197	0.974728	36.2429	0.983417	37.8679	0.988224	36.366	0.985384	37.7941	0.968295
33.283	0.98307	36.1936	0.975014	37.4741	0.955922	36.9571	0.96194	36.2921	0.985855	36.4153	0.983749	38.0648	0.976054	36.5631	0.969475	37.9909	0.982409
33.4559	0.986419	36.3414	0.939778	37.6464	0.957787	37.1049	0.962694	36.4646	0.970427	36.6124	0.990688	38.2616	0.987006	36.7601	0.988149	38.1386	0.962773
33.6534	0.983706	36.5138	0.98135	37.8433	0.96919	37.3018	0.947089	36.6616	0.966662	36.8094	0.972781	38.4338	0.996858	36.9571	0.988943	38.3354	0.977032
33.8015	0.978468	36.6616	0.953709	38.0155	0.962672	37.4741	0.968399	36.8094	0.980127	36.9818	0.987415	38.6305	0.981132	37.1295	0.971599	38.5321	0.988893
33.999	0.979687	36.8586	0.935143	38.1878	0.970181	37.6464	0.936727	37.031	0.978857	37.1541	0.977142	38.8273	0.989347	37.3018	0.98273	38.7043	0.983274
34.1717	0.98542	37.0064	0.952362	38.3846	0.965848	37.7941	0.918663	37.2034	0.968609	37.3511	0.969523	38.9994	0.99229	37.4988	0.968683	38.8764	0.975875
34.3444	0.983925	37.1541	0.942687	38.5813	0.948026	37.9417	0.952626	37.3757	0.956962	37.548	0.987485	39.1715	0.970377	37.6956	0.970524	39.0731	0.965855
34.5418	0.975406	37.3018	0.923958	38.7781	0.962653	38.1386	0.951677	37.548	0.971046	37.7203	0.986706	39.3681	0.98042	37.8433	0.969502	39.2698	0.970422
34.6898	0.975945	37.4741	0.937017	38.9502	0.957459	38.3108	0.937049	37.7203	0.967621	37.8925	0.989163	39.5648	0.984468	38.0402	0.980211	39.4173	0.975993
34.8871	0.98344	37.6464	0.965996	39.1223	0.955517	38.483	0.964377	37.8925	0.977686	38.0894	0.972501	39.7614	0.986356	38.237	0.974758	39.6139	0.981122
35.0351	0.977159	37.7941	0.943499	39.319	0.952744	38.6305	0.933751	38.0894	0.967349	38.237	0.981613	39.9334	0.98908	38.4338	0.973085	39.8105	0.981699
35.2324	0.97679	37.9663	0.93622	39.5156	0.95056	38.8027	0.943245	38.237	0.974785	38.4338	0.98498	40.1054	0.979108	38.6059	0.972583	40.0071	0.980924
35.4296	0.984419	38.1386	0.953906	39.6876	0.956828	38.9502	0.968867	38.4338	0.969573	38.6305	0.979123	40.3019	0.980003	38.8027	0.963475	40.1545	0.978815
35.5775	0.983771	38.2862	0.940799	39.9088	0.970115	39.1223	0.946597	38.6305	0.974981	38.8273	0.973492	40.4984	0.994306	38.9748	0.987906	40.351	0.969914
35.7747	0.974285	38.4584	0.965607	40.0808	0.955136	39.2944	0.933171	38.8273	0.977706	39.024	0.97262	40.6949	0.975654	39.1715	0.954068	40.5475	0.978909
35.9718	0.985967	38.6305	0.989103	40.2528	0.940787	39.4665	0.948463	38.9748	0.973761	39.2206	0.964654	40.8422	0.980899	39.3681	0.971895	40.744	0.97524
36.1197	0.981188	38.7781	0.945712	40.4493	0.959358	39.6139	0.944788	39.1715	0.962775	39.3927	0.983728	41.0386	0.983894	39.5156	0.975039	40.9159	0.982785
36.3168	0.978264	38.9502	0.957593	40.6458	0.960364	39.8105	0.940536	39.3681	0.97532	39.5648	0.993245	41.235	0.988658	39.7122	0.965903	41.0877	0.982503
36.4646	0.980455	39.1223	0.960068	40.8422	0.974655	39.9579	0.926271	39.5156	0.972664	39.7614	0.985212	41.4069	0.975925	39.9334	0.972084	41.2841	0.976596
36.6616	0.976795	39.2944	0.930845	41.0141	0.969515	40.1545	0.950429	39.7122	0.972028	39.9579	0.986699	41.6032	0.994238	40.1054	0.973277	41.4805	0.992303
36.834	0.983287	39.4665	0.941975	41.186	0.95188	40.3019	0.932994	39.8842	0.975721	40.1299	0.986159	41.775	0.977943	40.3019	0.989618	41.6523	0.970223
37.0064	0.96629	39.6139	0.960186	41.4069	0.946456	40.4984	0.917719	40.0562	0.963511	40.3019	0.982619	41.9713	0.987955	40.4984	0.973603	41.8241	0.977234
37.2034	0.972839	39.7859	0.934077	41.5787	0.97136	40.6949	0.927273	40.2528	0.95822	40.4984	0.973251	42.1676	0.97841	40.6703	0.976673	42.0204	0.979059
37.4003	0.991364	39.9334	0.943646	41.775	0.96282	40.8668	0.927426	40.4493	0.978327	40.6949	0.971352	42.3393	0.989301	40.8422	0.978924	42.2167	0.97707
37.548	0.985215	40.1054	0.950445	41.9713	0.967598	41.0386	0.934516	40.6212	0.972345	40.8913	0.975828	42.5356	0.999008	41.0386	0.975509	42.4129	0.97148
37.7449	0.981028	40.2528	0.962639	42.1431	0.957255	41.186	0.936653	40.7931	0.981741	41.0877	0.961491	42.7073	0.98731	41.235	0.972187	42.5846	0.975079
37.8925	0.975654	40.4247	0.962297	42.3639	0.970604	41.3578	0.948248	40.9895	0.97133	41.2596	0.96847	42.9035	0.98367	41.4314	0.969985	42.7808	0.970905
38.0894	0.959888	40.5966	0.958282	42.5111	0.972886	41.5051	0.972161	41.1614	0.980604	41.4314	0.977533	43.0996	0.985322	41.5787	0.973048	42.9525	0.975036
38.2616	0.981069	40.7685	0.956054	42.7073	0.972129	41.6523	0.918237	41.3332	0.964716	41.6278	0.978372	43.2712	0.986643	41.775	0.965866	43.1487	0.982744
38.4338	0.973869	40.9404	0.966147	42.9035	0.977283	41.8486	0.961521	41.5296	0.965453	41.7996	0.983793	43.4674	0.988908	41.9713	0.972336	43.3203	0.963395
38.6305	0.968868	41.1123	0.973193	43.0996	0.964098	42.0204	0.906987	41.7259	0.971118	41.9959	0.977606	43.6389	0.978564	42.1676	0.96492	43.5164	0.969089
38.7781	0.984005	41.2596	0.949689	43.2958	0.950368	42.1676	0.932475	41.8732	0.973538	42.1922	0.972395	43.835	1	42.3639	0.970867	43.688	0.97259
38.9748	0.974381	41.4314	0.96133	43.4674	0.950535	42.3148	0.951314	42.0695	0.976638	42.3884	0.952308	44.0311	0.983949	42.5356	0.979756	43.884	0.971906
39.1715	0.98173	41.5787	0.932467	43.6635	0.980104	42.4865	0.900533	42.2412	0.956128	42.5601	0.970433	44.2026	0.982927	42.7318	0.974876	44.0556	0.974059
39.319	0.981114	41.775	0.952827	43.835	0.980906	42.6582	0.953555	42.4129	0.98056	42.7563	0.975968	44.3986	0.98433	42.9035	0.981703	44.2271	0.979828
39.5156	0.99318	41.9468	0.972304	44.0311	0.975955	42.8054	0.937368	42.6092	0.969144	42.928	0.976222	44.5701	0.994906	43.1241	0.980639	44.4231	0.979394
39.6876	0.972183	42.1186	0.936924	44.2271	0.96794	43.0015	0.93971	42.8054	0.968375	43.1241	0.951546	44.7905	0.972324	43.2958	0.971119	44.5946	0.975444
39.8597	0.966624	42.2903	0.955842	44.3986	0.971152	43.1487	0.945996	42.9525	0.973351	43.3203	0.963306	44.9375	0.984619	43.4919	0.9702	44.7905	0.967488
40.0562	0.97537	42.4375	0.942384	44.5701	0.9584	43.3448	0.939997	43.1487	0.964752	43.4919	0.975629	45.1334	0.984755	43.688	0.961621	44.962	0.977591
40.2528	0.982937	42.6092	0.9867	44.766	0.961099	43.4919	0.952447	43.3448	0.976087	43.688	0.982448	45.3293	0.985454	43.8595	0.961866	45.1579	0.96582
40.4001	0.980115	42.7563	0.927339	44.962	0.975147	43.688	0.924356	43.4919	0.968638	43.884	0.970906	45.5007	0.983882	44.0311	0.959038	45.3538	0.961405
40.5966	0.98404	42.9525	0.938557	45.1579	0.966731	43.835	0.959263	43.688	0.978581	44.0801	0.976036	45.721	0.982792	44.2271	0.969547	45.5251	0.974325
40.7931	0.975079	43.0996	0.936298	45.3538	0.944935	44.0066	0.925664	43.884	0.977524	44.2761	0.951554	45.9168	0.975604	44.4231	0.967038	45.721	0.976879
40.9404	0.981682	43.2467	0.974589	45.5251	0.94972	44.1781	0.922029	44.0311	0.952328	44.4476	0.962679	46.1126	0.981076	44.5946	0.966489	45.8923	0.968979
41.1368	0.980145	43.4183	0.960119	45.721	0.970177	44.3741	0.927979	44.2271	0.966519	44.6191	0.968642	46.3329	0.978564	44.7905	0.970947	46.0881	0.972165
41.3087	0.982908	43.5899	0.94921	45.9168	0.971705	44.5211	0.919124	44.4231	0.962049	44.815	0.975239	46.5531	0.977323	44.9865	0.96317	46.2839	0.983948
41.4805	0.990382	43.737	0.959071	46.0881	0.975319	44.6925	0.963587	44.5701	0.94858	45.0109	0.956723	46.7488	0.973943	45.1824	0.97212	46.4552	0.952998
41.6769	0.97208	43.9085	0.942632	46.2839	0.974905	44.864	0.954196	44.7905	0.969143	45.2068	0.963717	46.9934	0.994443	45.3538	0.95778	46.6754	0.969726
41.8486	0.981715	44.1291	0.954706	46.4797	0.976706	45.0354	0.91938	44.962	0.958367	45.3782	0.972942	47.1891	0.983149	45.5496	0.960827	46.8222	0.970685
42.0204	0.978396	44.2761	0.940193	46.6754	0.9654	45.2068	0.954342	45.1579	0.968211	45.5496	0.964237	47.3848	0.973073	45.7455	0.969404	47.0179	0.966556
42.2167	0.982724	44.4476	0.963973	46.8467	0.953098	45.4027	0.962228	45.3048	0.967627	45.7455	0.985247	47.5804	0.976679	45.9413	0.960269	47.2136	0.964774
42.3884	0.97196	44.6191	0.954129	47.0423	0.980609	45.5496	0.927104	45.5007	0.959514	45.9413	0.955938	47.776	0.975256	46.1371	0.966486	47.4092	0.980688
42.5601	0.976808	44.7905	0.952635	47.238	0.976475	45.721	0.933523	45.6965	0.965199	46.1371	0.956927	47.9716	0.984229	46.3329	0.960612	47.5559	0.96545
42.7563	0.974432	44.962	0.954614	47.4092	0.976396	45.8923	0.92846	45.8434	0.959155	46.3329	0.958422	48.1672	0.981882	46.5041	0.956116	47.7515	0.968132
42.9525	0.972653	45.1334	0.941419	47.6048	0.958047	46.0392	0.949676	46.0392	0.978155	46.5041	0.948569	48.3627	0.975145	46.6999	0.962116	47.9471	0.971871
43.0996	0.97751	45.3048	0.974083	47.8005	0.993535	46.235	0.930751	46.2594	0.968211	46.6999	0.954992	48.5582	0.981329	46.8711	0.966749	48.1427	0.976075
43.2958	0.978587	45.4517	0.942441	47.996	0.979302	46.3818	0.933394	46.4307	0.968952	46.8956	0.974751	48.7537	0.970371	47.0668	0.968596	48.2894	0.970166
43.4919	0.974367	45.6231	0.968635	48.1916	0.979759	46.5531	0.946732	46.6265	0.954489	47.0668	0.946917	48.9492	0.975567	47.2625	0.974078	48.4849	0.958414
43.6389	0.971627	45.7944	0.949437	48.3627	0.960607	46.7733	0.92779	46.7733	0.963148	47.2625	0.958193	49.1447	0.999203	47.4581	0.971284	48.6804	0.972075
43.835	0.973447	45.9902	0.964376	48.5582	0.964536	46.92	0.934652	46.969	0.967509	47.4581	0.963953	49.3401	0.977931	47.6293	0.958692	48.8759	0.968446
44.0311	0.983268	46.1371	0.945616	48.7537	0.971411	47.1157	0.96251	47.1646	0.966193	47.6537	0.969334	49.5356	0.980671	47.8249	0.965616	49.047	0.959521
44.1781	0.975098	46.2839	0.977189	48.9248	0.958876	47.2625	0.898062	47.3358	0.974576	47.8005	0.965053	49.731	0.979291	48.0205	0.975961	49.218	0.968689
44.3741	0.973139	46.4552	0.972862	49.1203	0.971645	47.4581	0.950199	47.507	0.976249	47.996	0.953645	49.9263	0.973906	48.1916	0.972847	49.4134	0.974846
44.5701	0.998393	46.6265	0.968856	49.3157	0.970929	47.6048	0.933319	47.7027	0.964666	48.1916	0.961518	50.1217	0.996884	48.3871	0.957272	49.6088	0.960205
44.717	0.975326	46.8222	0.949769	49.5111	0.958893	47.8005	0.930435	47.8982	0.962683	48.3871	0.963388	50.2926	0.967479	48.5582	0.966051	49.7798	0.972063
44.913	0.966734	47.0179	0.943703	49.6821	0.953165	47.9716	0.920592	48.0449	0.970807	48.5827	0.97196	50.488	0.97552	48.7537	0.963006	49.9752	0.975218
45.1089	0.983539	47.1646	0.946066	49.8775	0.968472	48.1183	0.943261	48.2405	0.961396	48.7537	0.958803	50.6589	0.980589	48.9248	0.950633	50.1461	0.978209
45.2803	0.969812	47.3114	0.935613	50.0484	0.957108	48.2894	0.937532	48.436	0.966415	48.9492	0.958291	50.8541	0.978218	49.1447	0.961316	50.3171	0.963572
45.4517	0.969259	47.507	0.935608	50.2438	0.962171	48.4849	0.945789	48.6071	0.967383	49.1203	0.942111	51.0494	0.98276	49.3157	0.948317	50.488	0.981752
45.6475	0.985113	47.6537	0.952878	50.4391	0.978912	48.6316	0.925535	48.7782	0.960453	49.3157	0.960817	51.2447	0.984805	49.5111	0.963821	50.7077	0.966224
45.7944	0.981043	47.8005	0.97907	50.6344	0.965191	48.827	0.925465	48.9737	0.981774	49.5111	0.955186	51.4399	0.984053	49.7065	0.962718	50.8786	0.974041
45.9902	0.974138	47.9716	0.942666	50.8053	0.974988	48.9981	0.929598	49.1691	0.970087	49.7065	0.948877	51.6107	0.999533	49.9019	0.953814	51.0738	0.97223
46.186	0.982114	48.1427	0.933209	50.9762	0.968052	49.1447	0.947175	49.3401	0.956863	49.9019	0.955682	51.8059	0.981222	50.0973	0.964106	51.2691	0.96592
46.3329	0.974098	48.3138	0.920779	51.1959	0.96359	49.389	0.932162	49.5111	0.959797	50.0973	0.960869	52.0011	0.977016	50.2926	0.936037	51.4155	0.971472
46.5286	0.979843	48.4849	0.955309	51.3911	0.963083	49.5111	0.932527	49.7065	0.966597	50.2438	0.955902	52.1962	0.978982	50.4391	0.954348	51.6107	0.978456
46.7243	0.983194	48.656	0.917323	51.5619	0.937847	49.6821	0.928841	49.9019	0.966322	50.4147	0.965986	52.3914	0.98405	50.6344	0.943142	51.8059	0.972222
46.8956	0.981516	48.827	0.940385	51.7571	0.985996	49.8531	0.952501	50.0484	0.962597	50.6344	0.950554	52.5621	0.973906	50.8297	0.9452	52.0011	0.998623
47.0668	0.979419	48.9981	0.941504	51.9523	0.978452	49.9996	0.93717	50.2438	0.955298	50.8297	0.971583	52.7572	0.984737	51.0006	0.948581	52.1719	0.982522
47.2625	0.989558	49.1691	0.95261	52.1475	0.961176	50.1705	0.942962	50.4147	0.961568	51.0006	0.976632	52.9523	0.990618	51.2203	0.937537	52.3426	0.977981
47.4092	0.98188	49.3401	0.958385	52.3182	0.963352	50.3659	0.948565	50.5856	0.965263	51.2203	0.949065	53.1474	0.989533	51.4155	0.935487	52.5377	0.991878
47.6048	0.980225	49.5111	0.978661	52.5377	0.950499	50.5368	0.928541	50.7809	0.954355	51.4155	0.955786	53.3181	0.988044	51.5863	0.949613	52.7328	0.971696
47.8005	0.97621	49.6577	0.940166	52.7328	0.970097	50.7077	0.924724	50.9762	0.958687	51.5863	0.956975	53.5131	0.996706	51.7571	0.936481	52.9279	0.97336
47.9716	0.974435	49.8042	0.961425	52.9035	0.967571	50.8786	0.917641	51.147	0.949038	51.7571	0.957789	53.7081	0.976992	51.9523	0.962918	53.123	0.969513
48.1427	0.977567	49.9996	0.919787	53.0986	0.979993	51.0738	0.905783	51.3179	0.96647	51.9523	0.949528	53.8788	0.984731	52.1475	0.951379	53.2937	0.97875
48.3383	0.971184	50.195	0.938546	53.2693	0.974368	51.2203	0.946644	51.5131	0.940527	52.1475	0.956697	54.0737	0.98471	52.3426	0.939755	53.4643	0.986455
48.5338	0.969227	50.3903	0.94951	53.4643	0.947304	51.3911	0.931663	51.7083	0.956772	52.3426	0.944809	54.2687	0.986303	52.5377	0.962489	53.6594	0.981795
48.6804	0.970384	50.5856	0.935977	53.6594	0.969748	51.5619	0.924433	51.9035	0.961271	52.5377	0.947655	54.4637	0.985388	52.7328	0.933287	53.8544	0.954087
48.8759	0.976635	50.7321	0.948249	53.8544	0.963936	51.7571	0.889332	52.0499	0.971042	52.7085	0.952766	54.6342	0.983246	52.9279	0.94453	54.025	0.973966
49.047	0.983429	50.9274	0.922762	54.0494	0.976818	51.9279	0.937967	52.245	0.970165	52.9279	0.953713	54.8535	0.990495	53.123	0.941356	54.22	0.977628
49.2424	0.979102	51.0738	0.95097	54.22	0.983397	52.0743	0.959861	52.4402	0.95524	53.123	0.960817	55.0241	0.969895	53.3181	0.937375	54.3906	0.965106
49.4134	0.960502	51.2447	0.951781	54.4149	0.97517	52.245	0.919775	52.6353	0.976293	53.3181	0.957087	55.219	0.972683	53.4887	0.943244	54.5855	0.960922
49.6088	0.974427	51.4155	0.946925	54.6342	0.977193	52.4402	0.917799	52.7816	0.95769	53.4643	0.949203	55.4138	0.967439	53.6838	0.932049	54.7804	0.974558
49.7554	0.974214	51.6107	0.927587	54.8048	0.966606	52.6353	0.933759	52.9767	0.96258	53.6594	0.962943	55.5843	0.973325	53.8788	0.947135	54.951	0.973229
49.9508	0.965145	51.7571	0.92922	54.9754	0.971623	52.7816	0.925956	53.1718	0.967883	53.8544	0.941662	55.7792	0.973132	54.0494	0.939048	55.1215	0.967462
50.1461	0.971822	51.9279	0.963223	55.1702	0.936724	52.9523	0.931904	53.3424	0.956982	54.0494	0.956184	55.974	0.977906	54.2444	0.929874	55.3164	0.980813
50.2926	0.959516	52.0987	0.921386	55.3651	0.953727	53.123	0.920716	53.5131	0.972536	54.22	0.964502	56.1445	0.983899	54.4393	0.948695	55.5113	0.977862
50.4391	0.97766	52.2694	0.954273	55.56	0.944092	53.2693	0.941829	53.7081	0.953732	54.4393	0.954745	56.3393	0.963317	54.6342	0.947028	55.7061	0.976193
50.6589	0.971217	52.4402	0.923215	55.7548	0.952754	53.4643	0.926012	53.9031	0.955327	54.6099	0.929773	56.5341	0.98164	54.8292	0.936741	55.901	0.982155
50.8297	0.973224	52.6353	0.923117	55.9497	0.968233	53.6594	0.907879	54.0981	0.961844	54.7804	0.945903	56.7045	0.971477	54.9997	0.937814	56.0714	0.975488
51.025	0.964891	52.7816	0.942097	56.1201	0.97459	53.8056	0.935354	54.2444	0.957648	54.9754	0.951951	56.8992	0.973578	55.1702	0.940092	56.2662	0.976661
51.1714	0.959973	52.9767	0.919396	56.2906	0.966934	54.0006	0.909483	54.4393	0.956984	55.1702	0.960136	57.094	0.972455	55.3651	0.942446	56.4367	0.963706
51.3667	0.986178	53.123	0.908253	56.4854	0.980203	54.1469	0.89763	54.6342	0.953688	55.3651	0.950294	57.2644	0.977287	55.5843	0.93682	56.6315	0.978791
51.5619	0.974424	53.2937	0.944762	56.6801	0.977298	54.3418	0.90869	54.8292	0.967522	55.56	0.944529	57.4834	0.966331	55.7792	0.937984	56.8262	0.974168
51.7327	0.975567	53.4643	0.930552	56.8749	0.960364	54.488	0.924655	54.9754	0.94757	55.7548	0.946911	57.6538	0.970599	55.974	0.931903	56.9966	0.964214
51.9035	0.965276	53.6594	0.930185	57.0696	0.966477	54.683	0.900016	55.1702	0.946385	55.9497	0.955716	57.8485	0.971775	56.1445	0.944166	57.1914	0.978687
52.0987	0.961975	53.8056	0.932646	57.3131	0.981399	54.8292	0.931938	55.3651	0.948476	56.1201	0.952725	58.0188	0.96724	56.3393	0.929077	57.3617	0.982373
52.2938	0.967315	53.9519	0.926051	57.4591	0.9436	54.9997	0.916707	55.56	0.959709	56.3149	0.955964	58.2135	0.965801	56.5341	0.928978	57.5564	0.964692
52.4402	0.96987	54.1469	0.920767	57.6538	0.946652	55.1459	0.930817	55.7061	0.948637	56.5097	0.953883	58.4081	0.984394	56.7288	0.927929	57.7511	0.964859
52.6353	0.961106	54.3418	0.926862	57.8485	0.954441	55.3164	0.923236	55.901	0.952465	56.7045	0.962655	58.6027	0.977186	56.8992	0.933098	57.9458	0.96921
52.8304	0.974146	54.5124	0.920639	58.0188	0.959534	55.5113	0.942506	56.0958	0.955393	56.8749	0.952169	58.773	0.965053	57.094	0.92857	58.0918	0.96138
52.9767	0.958606	54.683	0.931123	58.2378	0.96957	55.6574	0.926092	56.2906	0.952152	57.0696	0.932062	58.9676	0.967636	57.2887	0.937929	58.2865	0.961857
53.1718	0.968389	54.8535	0.956422	58.4081	0.967129	55.8523	0.94597	56.4367	0.938227	57.2644	0.956627	59.1622	0.963419	57.4591	0.926597	58.4811	0.968099
53.3668	0.967552	55.0241	0.933979	58.6027	0.969319	56.0471	0.907603	56.6315	0.937346	57.4591	0.955815	59.3568	0.971903	57.6538	0.920977	58.6757	0.966577
53.5375	0.960354	55.1702	0.933341	58.7974	0.958047	56.1932	0.928912	56.8262	0.955181	57.6294	0.964149	59.5514	0.962006	57.8728	0.918442	58.8703	0.958525
53.7081	0.962632	55.3408	0.924653	58.992	0.958769	56.388	0.932974	57.021	0.938726	57.8241	0.946433	59.7216	0.964303	58.0431	0.91437	59.0406	0.968935
53.9031	0.979497	55.5113	0.929362	59.1865	0.988561	56.5341	0.903381	57.2157	0.934131	58.0188	0.957703	59.9161	0.970512	58.2378	0.911529	59.2352	0.976669
54.0737	0.97356	55.6574	0.915683	59.3811	0.96757	56.6801	0.903291	57.3617	0.941792	58.2135	0.951597	60.1107	0.965738	58.4081	0.919181	59.4298	0.974333
54.2687	0.959419	55.8523	0.933199	59.5514	0.949356	56.8749	0.897462	57.5564	0.941951	58.3838	0.93771	60.3052	0.967362	58.6027	0.922024	59.6	0.9716
54.4393	0.959626	55.9984	0.922745	59.7459	0.958069	57.0696	0.902615	57.7511	0.939467	58.5784	0.968641	60.4997	0.959485	58.8217	0.921749	59.7945	0.966682
54.6342	0.964052	56.1932	0.965116	59.9404	0.952684	57.2157	0.9533	57.9458	0.946591	58.773	0.941274	60.6698	0.965247	59.0163	0.923646	59.9648	0.9868
54.7804	0.966184	56.3393	0.925932	60.135	0.94231	57.4104	0.900787	58.0918	0.942297	58.9676	0.95697	60.8643	0.971549	59.1865	0.922855	60.1593	0.977691
54.9754	0.965142	56.5097	0.920469	60.3295	0.957233	57.5564	0.926774	58.2865	0.94354	59.1622	0.954974	61.0588	0.949349	59.3811	0.926058	60.3538	0.971706
55.1702	0.970898	56.6801	0.929928	60.524	0.966516	57.7511	0.911783	58.4811	0.94181	59.3568	0.961158	61.2289	0.962743	59.5757	0.928596	60.5483	0.967385
55.3408	0.968938	56.8749	0.903891	60.7185	0.959377	57.9458	0.924416	58.6514	0.946989	59.5514	0.936346	61.4234	0.964156	59.7459	0.921714	60.7185	0.970285
55.5113	0.968322	57.0696	0.911162	60.9129	0.971126	58.1161	0.960715	58.846	0.938725	59.7216	0.955772	61.6178	0.948427	59.9404	0.913329	60.9129	0.96999
55.6574	0.960591	57.2157	0.912987	61.1074	0.957043	58.2865	0.962283	59.0163	0.936469	59.9404	0.953236	61.8122	0.969881	60.135	0.922683	61.1074	0.967474
55.8523	0.95551	57.4104	0.923697	61.2775	0.96748	58.5054	0.913888	59.2109	0.954947	60.1107	0.943211	61.9823	0.961441	60.3538	0.918765	61.3018	0.968996
56.0471	0.945811	57.5808	0.918451	61.4963	0.945253	58.6757	0.917314	59.3811	0.942231	60.3052	0.950599	62.1767	0.955995	60.524	0.927082	61.472	0.958952
56.2419	0.959936	57.7511	0.927962	61.6664	0.957067	58.8217	0.918079	59.5514	0.945851	60.4997	0.939419	62.3711	0.935479	60.7185	0.921578	61.6664	0.95246
56.388	0.970124	57.8971	0.937107	61.8608	0.972236	58.992	0.901784	59.7459	0.956195	60.7185	0.954467	62.5655	0.939511	60.9129	0.910317	61.8851	0.957545
56.5828	0.9601	58.0675	0.921015	62.0795	0.953116	59.1622	0.919949	59.9404	0.933764	60.8886	0.944184	62.7598	0.964804	61.1074	0.928021	62.0309	0.961673
56.7532	0.9602	58.2378	0.879378	62.2496	0.972138	59.3325	0.907542	60.135	0.943853	61.0588	0.956952	62.9299	0.947724	61.3018	0.922963	62.2253	0.962874
56.9236	0.966448	58.4324	0.922098	62.444	0.966082	59.5027	0.94073	60.3295	0.93693	61.2775	0.946683	63.1	0.949999	61.472	0.897799	62.4197	0.954007
57.1183	0.958411	58.5784	0.894892	62.6141	0.956913	59.6486	0.902396	60.4754	0.938117	61.4477	0.939214	63.2943	0.947056	61.6664	0.927721	62.6141	0.961638
57.2887	0.957961	58.773	0.916295	62.7841	0.948416	59.8432	0.908491	60.6698	0.938339	61.6907	0.934468	63.4886	0.951159	61.8851	0.896855	62.7598	0.97636
57.4834	0.956684	58.9676	0.925752	62.9785	0.975709	60.0134	0.936499	60.8643	0.93094	61.8365	0.952595	63.6586	0.945342	62.0795	0.916806	62.9542	0.96186
57.6538	0.94565	59.1379	0.936079	63.1971	0.94284	60.2322	0.950193	61.0588	0.937056	62.0309	0.933129	63.8529	0.942193	62.2739	0.906933	63.1485	0.956367
57.8485	0.963982	59.3082	0.928587	63.3914	0.929329	60.3781	0.937417	61.2046	0.937436	62.2253	0.935167	64.0472	0.942759	62.444	0.911471	63.3429	0.964201
58.0188	0.971203	59.5027	0.910398	63.5615	0.944732	60.5483	0.914017	61.3991	0.917596	62.4197	0.935318	64.2415	0.943401	62.6141	0.911374	63.5372	0.949612
58.1891	0.959902	59.6973	0.918316	63.7801	0.964833	60.7185	0.916077	61.5935	0.924569	62.6141	0.949013	64.4358	0.939702	62.8084	0.920081	63.7072	0.963289
58.3838	0.958241	59.8675	0.913629	63.9744	0.94502	60.9129	0.933895	61.7636	0.929589	62.7841	0.940145	64.6058	0.949331	63.0028	0.918311	63.9015	0.970831
58.5298	0.960687	60.0377	0.939439	64.1444	0.933734	61.0831	0.927342	61.958	0.930459	62.9785	0.926501	64.8	0.93238	63.1728	0.912539	64.0958	0.970352
58.7244	0.953161	60.2079	0.922753	64.3387	0.953788	61.2532	0.911967	62.1281	0.925693	63.1485	0.924027	64.9943	0.928356	63.3672	0.905328	64.2658	0.956651
58.919	0.956012	60.4024	0.923603	64.5086	0.941561	61.3991	0.884741	62.3225	0.929316	63.3672	0.918573	65.1885	0.940486	63.5615	0.915087	64.4601	0.958429
59.1136	0.96319	60.5483	0.921664	64.7272	0.945486	61.5935	0.889631	62.5169	0.932394	63.5372	0.915206	65.3827	0.930465	63.7801	0.900402	64.6543	0.943105
59.2595	0.961935	60.7185	0.92623	64.8971	0.936841	61.7879	0.922467	62.6627	0.9293	63.7315	0.909579	65.577	0.933022	63.9744	0.886745	64.8486	0.962294
59.4541	0.958675	60.8643	0.897383	65.0914	0.940979	61.9337	0.925251	62.857	0.914249	63.9258	0.911862	65.7712	0.952287	64.1687	0.893924	65.0185	0.961411
59.6	0.947877	61.0588	0.90495	65.2856	0.943229	62.1281	0.890861	63.0271	0.930121	64.1201	0.931906	65.9411	0.929532	64.3629	0.90689	65.2128	0.949241
59.8189	0.959011	61.2046	0.902234	65.5041	0.953595	62.3225	0.938664	63.2214	0.932342	64.3144	0.918442	66.1353	0.917363	64.5572	0.909058	65.3827	0.951908
60.0377	0.945358	61.3748	0.914941	65.6741	0.954033	62.5169	0.942487	63.3914	0.936776	64.5086	0.917085	66.3052	0.925739	64.7515	0.884087	65.6012	0.950155
60.1836	0.945753	61.5935	0.900493	65.8683	0.939866	62.687	0.928854	63.5858	0.9215	64.7029	0.914247	66.4994	0.921895	64.9457	0.886647	65.7712	0.954547
60.3538	0.958655	61.7393	0.914923	66.0625	0.944697	62.857	0.923036	63.7801	0.920487	64.8729	0.89573	66.6935	0.913988	65.1399	0.894179	65.9654	0.9591
60.4997	0.944827	61.9337	0.903774	66.2566	0.955167	63.0514	0.892448	63.9501	0.919202	65.0914	0.931297	66.8877	0.935412	65.3342	0.872601	66.1353	0.9499
60.7185	0.948467	62.1038	0.913827	66.4508	0.937504	63.1971	0.886175	64.1444	0.922659	65.2856	0.912255	67.0818	0.914519	65.5284	0.889561	66.3295	0.949162
60.8886	0.950291	62.2739	0.928896	66.645	0.929147	63.3672	0.89953	64.3144	0.921355	65.4798	0.905666	67.2517	0.914067	65.6983	0.881065	66.5236	0.955055
61.0588	0.948897	62.4197	0.909496	66.8392	0.938196	63.5372	0.90923	64.5086	0.906223	65.6741	0.88462	67.4701	0.907148	65.8925	0.86801	66.7178	0.939439
61.2532	0.946184	62.6141	0.913031	67.0333	0.946086	63.7072	0.89847	64.6786	0.896319	65.8683	0.908363	67.64	0.912507	66.0867	0.878212	66.8877	0.949558
61.4234	0.947185	62.7841	0.901965	67.2274	0.944674	63.8772	0.89905	64.8486	0.918292	66.0382	0.885115	67.8341	0.933056	66.2809	0.861794	67.0818	0.920854
61.6178	0.947774	62.9542	0.910681	67.4216	0.921229	64.0715	0.943841	65.0428	0.901663	66.2324	0.892085	68.0282	0.930165	66.4751	0.866147	67.276	0.932522
61.7879	0.942117	63.1242	0.893396	67.6157	0.927619	64.2172	0.889603	65.2371	0.917386	66.4265	0.878265	68.2223	0.89917	66.6693	0.86614	67.4701	0.926395
61.9823	0.956636	63.3186	0.891314	67.8098	0.928627	64.4115	0.886535	65.4313	0.908419	66.6207	0.881647	68.4164	0.900596	66.8634	0.865743	67.64	0.937158
62.1767	0.948384	63.4886	0.905295	68.004	0.90365	64.6058	0.88611	65.6255	0.899905	66.8149	0.874507	68.6105	0.894389	67.0576	0.860363	67.8098	0.9011
62.3225	0.948566	63.6586	0.905581	68.1981	0.922297	64.7515	0.914226	65.7954	0.896233	67.009	0.883425	68.7804	0.892884	67.276	0.843078	68.004	0.918177
62.4683	0.947319	63.8287	0.910487	68.3922	0.920761	64.9457	0.902141	65.9654	0.897723	67.2032	0.876318	68.9744	0.906974	67.4459	0.837955	68.1981	0.923649
62.687	0.941934	64.0229	0.901003	68.5863	0.918358	65.0914	0.910013	66.1595	0.894864	67.3973	0.868303	69.1685	0.879717	67.6157	0.837578	68.3922	0.918565
62.857	0.942477	64.2172	0.892974	68.7804	0.919601	65.2856	0.908952	66.3537	0.904393	67.5672	0.867519	69.3383	0.890369	67.8341	0.838899	68.5863	0.915065
63.0514	0.948321	64.3629	0.898058	68.9744	0.912084	65.4798	0.914424	66.5479	0.892762	67.7613	0.869723	69.5324	0.871444	68.004	0.83423	68.7804	0.91795
63.2214	0.956938	64.5572	0.86792	69.1685	0.879092	65.6498	0.892969	66.7178	0.90179	67.9554	0.85222	69.7264	0.859263	68.2223	0.8205	68.9744	0.908625
63.3914	0.943229	64.7272	0.884352	69.3383	0.898702	65.8197	0.876922	66.912	0.893625	68.1738	0.846128	69.8962	0.873604	68.3922	0.812873	69.12	0.904337
63.5858	0.933044	64.8971	0.877223	69.5566	0.900116	66.0139	0.874644	67.0818	0.893286	68.3679	0.855224	70.0903	0.862246	68.6105	0.814366	69.3141	0.886473
63.7801	0.937606	65.0914	0.889466	69.7507	0.850709	66.1595	0.870342	67.276	0.890125	68.562	0.835078	70.2843	0.856715	68.8046	0.795379	69.5081	0.882089
63.9258	0.931682	65.2371	0.912158	69.9447	0.878395	66.3537	0.88241	67.4459	0.885924	68.7561	0.846417	70.4784	0.860517	69.023	0.791774	69.7022	0.893847
64.1201	0.935341	65.4313	0.882906	70.1388	0.873223	66.5479	0.878957	67.6157	0.869636	68.9259	0.822961	70.6724	0.845361	69.1685	0.780938	69.8962	0.879259
64.3144	0.943434	65.577	0.918131	70.3328	0.866383	66.7178	0.906909	67.8098	0.879189	69.12	0.816801	70.8422	0.843156	69.3868	0.754714	70.0903	0.878821
64.4601	0.937229	65.7712	0.897966	70.5269	0.840162	66.8877	0.895069	68.004	0.872987	69.3141	0.797858	71.0362	0.82658	69.5809	0.774926	70.2601	0.877984
64.6543	0.91839	65.9168	0.871092	70.7209	0.865888	67.1304	0.869255	68.1981	0.869677	69.5081	0.795343	71.2302	0.809132	69.7507	0.746458	70.4298	0.856828
64.8486	0.94784	66.111	0.874349	70.9149	0.826191	67.276	0.842516	68.3679	0.860358	69.7022	0.802155	71.4242	0.813004	69.969	0.751758	70.6239	0.855427
65.0185	0.93633	66.3052	0.868963	71.1089	0.827514	67.4459	0.864743	68.562	0.846318	69.8962	0.769357	71.6182	0.809178	70.1631	0.730543	70.8179	0.8537
65.2128	0.939738	66.4508	0.911881	71.3029	0.813824	67.6157	0.857217	68.7318	0.865107	70.0903	0.764961	71.8122	0.807161	70.3328	0.718322	71.0119	0.857293
65.3827	0.936085	66.645	0.893337	71.4969	0.80224	67.8098	0.879821	68.9259	0.866193	70.3086	0.759403	72.0062	0.790428	70.5269	0.704637	71.1817	0.831318
65.577	0.930049	66.8392	0.901186	71.6909	0.795218	67.9554	0.8811	69.0957	0.844802	70.5026	0.728029	72.1759	0.768043	70.7209	0.698982	71.3514	0.835109
65.7712	0.917848	66.9848	0.889772	71.8849	0.80252	68.1496	0.859977	69.2655	0.855376	70.6966	0.720842	72.3699	0.765826	70.9149	0.686348	71.5697	0.823778
65.9411	0.925167	67.1789	0.890443	72.0789	0.755314	68.3194	0.863065	69.4596	0.835532	70.8907	0.718439	72.5639	0.753805	71.1089	0.656079	71.7395	0.817991
66.111	0.916825	67.3731	0.851274	72.2729	0.765574	68.5378	0.837719	69.6537	0.826507	71.0604	0.702369	72.7579	0.75836	71.3029	0.669282	71.9334	0.806313
66.3052	0.910549	67.5187	0.887579	72.4427	0.744505	68.7076	0.84257	69.8477	0.847157	71.2787	0.703697	72.9519	0.739308	71.5212	0.644792	72.1274	0.803087
66.4994	0.930674	67.7128	0.874944	72.6609	0.702604	68.8774	0.856641	70.0175	0.828422	71.4727	0.685705	73.1458	0.707271	71.7152	0.62513	72.2972	0.786442
66.645	0.920182	67.8826	0.85075	72.8549	0.719721	69.0472	0.837648	70.1873	0.805668	71.6667	0.674387	73.3398	0.722058	71.9092	0.609481	72.4912	0.782907
66.8392	0.923601	68.0525	0.883755	73.0488	0.701531	69.217	0.839763	70.3813	0.811886	71.8365	0.661027	73.5095	0.699655	72.1032	0.609171	72.6852	0.769439
67.0333	0.917078	68.2466	0.872068	73.2428	0.671313	69.4111	0.866104	70.5754	0.810795	72.0304	0.633379	73.7035	0.694139	72.2972	0.578547	72.8791	0.748427
67.2032	0.904351	68.3922	0.86408	73.4368	0.671403	69.5809	0.847832	70.7694	0.787097	72.2244	0.625923	73.8974	0.664919	72.4669	0.554862	73.0488	0.728738
67.3731	0.920179	68.5863	0.868787	73.6307	0.6628	69.7507	0.834672	70.9634	0.795998	72.4427	0.602506	74.0914	0.667836	72.6852	0.550988	73.2428	0.737985
67.5672	0.904925	68.7318	0.835022	73.8247	0.615946	69.9447	0.835593	71.1574	0.787944	72.6366	0.567366	74.2853	0.64685	72.8791	0.527559	73.4368	0.713567
67.7613	0.908419	68.9259	0.851189	73.9944	0.58906	70.0903	0.832856	71.3272	0.766835	72.8064	0.577238	74.455	0.637786	73.0488	0.515699	73.6307	0.708695
67.9069	0.907206	69.12	0.871091	74.2126	0.592776	70.2843	0.80354	71.4969	0.775877	73.0004	0.57012	74.6732	0.611583	73.2671	0.48489	73.8247	0.684838
68.101	0.892497	69.2898	0.856187	74.4066	0.568197	70.4541	0.839249	71.6909	0.77515	73.2186	0.532168	74.8672	0.589969	73.461	0.469393	73.9944	0.672076
68.2951	0.897238	69.4596	0.835498	74.6005	0.541016	70.6239	0.790548	71.8849	0.741111	73.4125	0.517122	75.0369	0.574252	73.655	0.439065	74.1641	0.655806
68.4892	0.892023	69.6052	0.846509	74.7944	0.527875	70.8179	0.787301	72.0304	0.729863	73.6065	0.520077	75.2066	0.560308	73.8247	0.430481	74.3581	0.628723
68.6348	0.897985	69.8235	0.829409	74.9884	0.49979	70.9877	0.765024	72.2244	0.708812	73.8005	0.478424	75.4248	0.548825	74.0429	0.416835	74.552	0.629483
68.8289	0.885008	69.9933	0.848746	75.1096	0.490764	71.2059	0.789812	72.4184	0.711389	73.9944	0.453466	75.6187	0.513618	74.2368	0.391988	74.746	0.586531
69.023	0.898111	70.1631	0.854022	75.352	0.46893	71.3757	0.749611	72.5882	0.677275	74.1641	0.453023	75.7884	0.493866	74.4308	0.367604	74.9399	0.590229
69.1685	0.893766	70.3328	0.82287	75.546	0.440294	71.5697	0.772444	72.7821	0.685965	74.3823	0.418051	75.9823	0.497356	74.6247	0.364391	75.1339	0.563085
69.3626	0.881852	70.4784	0.862528	75.7641	0.432121	71.7395	0.759842	72.9761	0.670279	74.5763	0.408351	76.1762	0.46447	74.8429	0.337664	75.3278	0.55038
69.5324	0.87292	70.6724	0.829852	75.9581	0.403784	71.8849	0.763758	73.1458	0.662393	74.7944	0.386273	76.3702	0.450998	75.0126	0.343624	75.4975	0.533489
69.7022	0.871977	70.8422	0.822427	76.152	0.3803	72.0789	0.773739	73.3398	0.635609	74.9641	0.350754	76.5641	0.425737	75.1823	0.316678	75.6914	0.525047
69.8962	0.853132	71.0119	0.829638	76.3459	0.365415	72.2487	0.708544	73.5338	0.632995	75.1339	0.341124	76.758	0.424619	75.3763	0.267738	75.8611	0.479233
70.0903	0.867751	71.2059	0.796582	76.5399	0.350275	72.4184	0.720605	73.7035	0.625979	75.3278	0.32163	76.9277	0.373416	75.5944	0.272835	76.055	0.460499
70.2601	0.858089	71.3757	0.809312	76.7338	0.344712	72.6124	0.695389	73.8732	0.607546	75.546	0.311186	77.1216	0.354643	75.7884	0.266348	76.249	0.451102
70.4298	0.865335	71.5455	0.796801	76.9035	0.297028	72.7821	0.69296	74.0671	0.582996	75.7399	0.283273	77.3156	0.337429	75.9823	0.241371	76.4429	0.433287
70.6239	0.849137	71.7395	0.768607	77.0974	0.294342	72.9519	0.716408	74.2611	0.555323	75.9338	0.279695	77.5095	0.333755	76.1762	0.230564	76.6368	0.404558
70.8179	0.847301	71.9092	0.784119	77.2913	0.253673	73.1458	0.660091	74.455	0.543525	76.1278	0.271039	77.7034	0.327137	76.3944	0.208429	76.8065	0.380005
70.9634	0.827296	72.0789	0.750686	77.4852	0.253969	73.2913	0.665361	74.649	0.530312	76.3459	0.235329	77.8731	0.294015	76.5641	0.185573	77.0004	0.363338
71.1574	0.8418	72.2729	0.772666	77.7034	0.251684	73.4853	0.67722	74.8187	0.510574	76.5156	0.21904	78.0912	0.276947	76.758	0.205378	77.1701	0.365393
71.3514	0.827931	72.4184	0.738109	77.8973	0.232224	73.6792	0.607456	75.0126	0.502246	76.7095	0.224085	78.2609	0.272208	76.952	0.178893	77.364	0.339761
71.4969	0.811047	72.6124	0.747297	78.0912	0.194083	73.8489	0.657983	75.1823	0.476535	76.9035	0.20054	78.4548	0.241385	77.1216	0.142713	77.558	0.310765
71.6909	0.801023	72.8064	0.719043	78.2852	0.179977	74.0187	0.655409	75.3763	0.468866	77.1216	0.181494	78.6488	0.234397	77.3398	0.159693	77.7519	0.305715
71.8849	0.79595	72.9519	0.737869	78.4791	0.181671	74.1884	0.619211	75.546	0.45671	77.3156	0.174958	78.8185	0.214735	77.558	0.150513	77.9458	0.26931
72.0789	0.802487	73.1458	0.662341	78.6488	0.16405	74.3581	0.56182	75.7399	0.418197	77.4852	0.164359	79.0124	0.215354	77.7519	0.134403	78.0912	0.270823
72.2244	0.781199	73.3398	0.718881	78.8669	0.162419	74.552	0.592014	75.9096	0.393603	77.6792	0.134915	79.2063	0.185607	77.9216	0.118919	78.2852	0.24645
72.4184	0.774452	73.4853	0.662704	79.0609	0.154305	74.7217	0.542356	76.1035	0.383551	77.8973	0.131855	79.4002	0.176972	78.1397	0.122234	78.5033	0.243342
72.6124	0.773104	73.6792	0.70591	79.2305	0.13858	74.8914	0.536897	76.2974	0.365387	78.067	0.134115	79.5941	0.167649	78.2852	0.0962533	78.673	0.208325
72.7821	0.744703	73.8732	0.678495	79.4487	0.140249	75.0854	0.551961	76.4914	0.348197	78.2852	0.107986	79.7881	0.165206	78.5033	0.0948249	78.8669	0.195141
72.9519	0.747403	74.0671	0.6635	79.6184	0.126315	75.2793	0.545817	76.6611	0.318812	78.4548	0.110876	79.982	0.138956	78.6973	0.0802346	79.0366	0.183044
73.1458	0.736193	74.2611	0.67092	79.8365	0.0980787	75.4732	0.512625	76.8307	0.311929	78.673	0.0912262	80.1517	0.136391	78.8912	0.0922049	79.2548	0.171144
73.3398	0.70754	74.455	0.625159	80.0305	0.0859195	75.6187	0.466724	77.0247	0.300364	78.8669	0.0916116	80.3456	0.112405	79.0851	0.0737867	79.4002	0.16032
73.5095	0.70557	74.6005	0.591575	80.2244	0.0750688	75.8126	0.423257	77.2186	0.27864	79.0609	0.0728864	80.5395	0.120938	79.3033	0.077765	79.5941	0.129711
73.6792	0.68749	74.7702	0.611588	80.3941	0.0750001	76.0066	0.427178	77.4125	0.248789	79.2548	0.0886586	80.7335	0.0976099	79.4972	0.0594069	79.7881	0.144261
73.8732	0.666461	74.9641	0.579483	80.588	0.058204	76.2005	0.413421	77.6064	0.246201	79.4487	0.0808433	80.9274	0.0990286	79.6911	0.0572178	79.982	0.127999
74.0671	0.665313	75.1581	0.593661	80.8062	0.0734808	76.3459	0.401279	77.8004	0.219651	79.6426	0.0676183	81.1213	0.0959679	79.8608	0.0695516	80.1759	0.11348
74.2368	0.654228	75.3278	0.543716	80.9759	0.0673747	76.5399	0.391901	77.9458	0.212519	79.8365	0.0650976	81.291	0.088541	80.0789	0.058393	80.3456	0.0972859
74.4066	0.623586	75.5217	0.527461	81.1941	0.0514989	76.7095	0.370798	78.1397	0.19141	80.0305	0.0711844	81.485	0.0660922	80.2729	0.0632658	80.5395	0.108663
74.6005	0.621072	75.6672	0.541986	81.3395	0.0655099	76.8792	0.338097	78.3336	0.185765	80.2244	0.049212	81.6547	0.0644236	80.4668	0.0452976	80.7335	0.0748297
74.7702	0.591998	75.8611	0.483246	81.5577	0.044805	77.0732	0.303889	78.5276	0.164386	80.4183	0.0405005	81.8486	0.0540335	80.6365	0.049541	80.9032	0.0740275
74.9399	0.559976	76.0066	0.510087	81.7516	0.0669902	77.2671	0.306411	78.6973	0.152476	80.6123	0.068726	82.0426	0.0533133	80.8304	0.0424863	81.0971	0.0810817
75.1339	0.564431	76.1762	0.463334	81.9456	0.0466921	77.4125	0.299158	78.8669	0.14636	80.8062	0.0444342	82.2365	0.0425316	81.0486	0.0428963	81.291	0.0654682
75.3035	0.542079	76.3702	0.444312	82.1153	0.0344512	77.6064	0.291584	79.0609	0.124496	81.0001	0.0432037	82.4305	0.0518425	81.2425	0.0159531	81.485	0.0778509
75.4732	0.522702	76.5399	0.421147	82.3092	0.0186971	77.8004	0.279374	79.2548	0.12413	81.1941	0.0334868	82.6244	0.0454034	81.4122	0.0210254	81.6789	0.0468367
75.6672	0.50963	76.7095	0.390225	82.5274	0.0484148	77.97	0.283923	79.4245	0.10336	81.388	0.0340581	82.7941	0.0606339	81.6062	0.0329702	81.8728	0.0464451
75.8369	0.495278	76.9035	0.427578	82.6971	0.0276923	78.164	0.239866	79.6426	0.106803	81.5819	0.0297851	82.9881	0.0434603	81.8001	0.0303429	82.0183	0.0437038
76.0066	0.478122	77.0732	0.386863	82.8911	0.0173496	78.3336	0.231391	79.7881	0.0930894	81.7759	0.0222086	83.182	0.0245513	81.9941	0.0220995	82.2123	0.0492647
76.2247	0.453502	77.2671	0.402046	83.0851	0.0253	78.5276	0.214416	79.982	0.0841446	81.9698	0.0232293	83.376	0.0206524	82.2123	0.0230378	82.4062	0.0358193
76.3944	0.437455	77.4125	0.371633	83.279	0.0288104	78.7215	0.204257	80.1759	0.0826861	82.1638	0.0238594	83.57	0.0217661	82.382	0.0270707	82.6002	0.0408581
76.5883	0.408659	77.6307	0.32742	83.473	0.0189311	78.9154	0.173509	80.3698	0.0739573	82.3577	0.0358335	83.764	0.0298069	82.5759	0.0157736	82.7941	0.0301214
76.7338	0.386793	77.8004	0.336739	83.667	0.0285021	79.0609	0.165995	80.5395	0.0524866	82.5517	0.0304519	83.9579	0.0184378	82.7699	0.0221441	82.9881	0.0138826
76.9277	0.365407	77.97	0.346327	83.8609	0.0430359	79.2548	0.149405	80.7335	0.0526143	82.7456	0.0165004	84.1519	0.0168116	82.9881	0.0169014	83.182	0.0248803
77.0974	0.348638	78.1397	0.296489	84.0549	0.0376681	79.4487	0.172351	80.9032	0.0504022	82.9396	0.0485802	84.3459	0.028338	83.182	0.00933755	83.3518	0.0325494
77.2671	0.341559	78.3094	0.276343	84.2489	0.0157262	79.6184	0.149395	81.0971	0.0461928	83.1336	0.0164859	84.5156	0	83.3518	0.00802847	83.5457	0.0295536
77.461	0.305728	78.4791	0.242892	84.4429	0.00927471	79.8123	0.156766	81.291	0.0539149	83.3275	0.0243054	84.7096	0.00618037	83.5457	0.0141603	83.7155	0.0238817
77.6307	0.304034	78.6488	0.230704	84.6369	0.0137658	79.982	0.133086	81.4607	0.0527769	83.5215	0.0232915	84.9036	0.014107	83.7397	0.0262581	83.9094	0.0167022
77.8246	0.286656	78.8185	0.231146	84.8309	0.0148654	80.1759	0.134642	81.6547	0.0381166	83.7155	0.0236446	85.0734	0.00361653	83.9337	0.0192199	84.1034	0.0136868
77.9943	0.257091	79.0124	0.218235	85.0249	0.0124164	80.3698	0.0802334	81.8244	0.0465354	83.9094	0.0165754	85.2917	0.0192642	84.1519	0.0172121	84.2974	0
78.1882	0.239835	79.1821	0.216425	85.2189	0.0231436	80.5153	0.133509	82.0183	0.020205	84.1034	0.0189724	85.4614	0.0187192	84.3217	0.00439548	84.4914	0.0117418
78.3821	0.227146	79.3517	0.171396	85.4129	0.0175715	80.7092	0.0939755	82.2123	0.0311784	84.2974	0.00722691	85.6554	0.0222511	84.5156	0.00145939	84.6854	0.0181381
78.5276	0.22382	79.4972	0.185924	85.6069	0	80.8547	0.0874131	82.382	0.030383	84.4671	0.019253			84.7096	0.0146458	84.9036	0.000841963
78.7215	0.213197	79.6911	0.163706	85.8009	0.0103836	81.0486	0.116779	82.5759	0.0263246	84.6854	0.0205526			84.9279	0.00634863	85.0491	0.00170351
78.9154	0.188655	79.8608	0.159906			81.2425	0.0683696	82.7699	0.0106483	84.9036	0.0290637			85.0976	0.0372782	85.2431	0.0264598
79.0851	0.196321	80.0305	0.152457			81.4122	0.0375045	82.9396	0.0121695	85.0734	0			85.2917	0	85.4129	0.00226482
79.2548	0.168714	80.2244	0.173805			81.5819	0.121798	83.1336	0.02305	85.2674	0.000711179			85.4857	0.0176011	85.6069	0.00761683
79.4487	0.149425	80.3698	0.168126			81.7516	0.0610963	83.279	0.00656663	85.4614	0.00579176			85.6797	0.0192609	85.8009	0.00249326
79.6426	0.139024	80.5638	0.155859			81.9456	0.0794066	83.473	0.0231138	85.6312	0.0145092			85.8737	0.0185312
79.8365	0.133654	80.7335	0.0985752			82.1153	0.0965321	83.667	0.000261272	85.8252	0.0228498
79.982	0.135931	80.9032	0.11887			82.285	0.0370596	83.8609	0.0309346
80.1759	0.12017	81.0971	0.0798963			82.4547	0.0714756	84.0549	0.0122972
80.3698	0.114054	81.291	0.129432			82.6487	0.0596043	84.2247	0
80.5395	0.0916439	81.4365	0.0863951			82.8184	0.0556267	84.3944	0.0108863
80.7092	0.0924322	81.6304	0.0880809			83.0366	0.0400198	84.5884	0.0182252
80.9032	0.0803848	81.7759	0.0988647			83.2063	0.056823	84.7824	0.00195663
81.0971	0.0697426	81.9698	0.107897			83.376	0.0605446	84.9764	0.0103986
81.2668	0.0759348	82.1153	0.0671255			83.57	0.0596755	85.1461	0.00876712
81.4607	0.0596888	82.3092	0.0566139			83.764	0.0238354	85.9222	0.00782654
81.6304	0.0695198	82.5032	0.054825			83.9337	0.0254882
81.8244	0.0551646	82.6729	0.0680467			84.1034	0.0737655
82.0183	0.0411235	82.8426	0.0500475			84.2974	0.0628237
82.188	0.0536165	83.0123	0.0107861			84.4914	0.0207733
82.3577	0.039267	83.182	0.0884027			84.6369	0.0338741
82.5517	0.0368107	83.376	0.0648032			84.8309	0.0545944
82.7456	0.0425573	83.5215	0.0638261			84.9764	0.0329487
82.8911	0.0254373	83.7397	0.0943657			85.1704	0
83.0851	0.0377646	83.9094	0.0378218			85.3644	0.0405086
83.279	0.0184967	84.0549	0.036556			85.5099	0.0105383
83.4488	0.0217357	84.2489	0.0314269			85.7039	0.0291029
83.6185	0.0114191	84.4429	0.0344281
83.8125	0.0239064	84.5884	0.0539888
84.0064	0.0185082	84.7824	0.0684817
84.8309	0.0252316	84.9279	0.0549343
84.9521	0.0260656	85.1219	0.0254702
85.0491	0.0065464	85.2917	0.0360943
85.1461	0.018451	85.5827	0.0570946
85.2917	0.00609512	85.7039	0.073278
85.3644	0.0221698	85.7282	0.0540289
85.4614	0.00709479	85.7767	0
85.5099	0.00973392
85.5584	0.00157662
85.5827	0
85.5827	0.0154577
85.6069	0.0199934
